# Supplementary material for: Transcriptional Regulatory Networks Associate with Early Stages of Potato Virus X Infection of Solanum tuberosum
Source: MDPI journal article supplement (doi:10.3390/ijms22062837), 2021-03-11
Supplement: s1 [file s1]

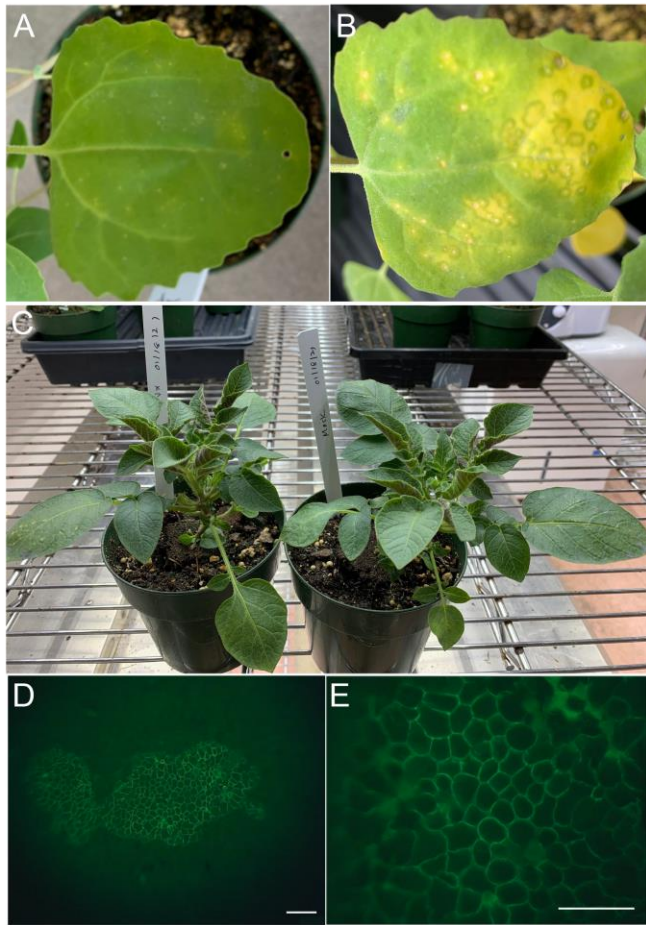

**Figure S1.** Standardization of PVX-GFP inoculum. (A), (B) Infection foci on *Chenopodium* leaves at 4 and 7 dpi were counted to determine the infectivity of the standard 20  $\mu$ l inoculum dose. (C), (D) Representative potato plants that were inoculated with PVX-GFP and mock inoculum. (E), (F) Fluorescence microscopic images showing PVX-GFP containing infection foci on inoculated potato leaves.
