# Supplementary material for: Transcriptional Regulatory Networks Associate with Early Stages of Potato Virus X Infection of Solanum tuberosum
Source: Int J Mol Sci. 2021 Mar 11;22(6):2837. doi: 10.3390/ijms22062837 (PMC8001266; doi:10.3390/ijms22062837)
Supplement: Supplementary file 1 [file ijms-22-02837-s001.zip › Supplementary Tables.xlsx]

## Sheet: Table S1
Table S1: Summary of the RNA-sequencing statistics.
Time point	Treatment	Biological Replicate	No. of RNA-Seq read pairs	No. of mapped read pairs	No of uniqely mapped read pairs	No of multimapped read pairs	Alignment Rate (%)
2 days	Mock	1	37078944	3.36009e+07	30364831	1240121	90.62
		2	37757890	3.41709e+07	30846632	1336401	90.5
		3	38180348	3.44578e+07	31000863	1353331	90.25
	PVX	1	37737673	3.38356e+07	30556150	1254653	89.66
		2	38404808	3.4453e+07	31115585	1299485	89.71
		3	37820731	3.39138e+07	30353012	1257333	89.67
3 days	Mock	1	37427019	3.33475e+07	30211852	1085891	89.1
		2	38409887	3.43231e+07	31154475	1048584	89.36
		3	37810885	3.3837e+07	30728093	1067413	89.49
	PVX	1	38197249	3.39688e+07	30936512	1348050	88.93
		2	37447044	3.33691e+07	29990348	1295035	89.11
		3	37116922	3.36354e+07	29712411	1265852	90.62
Overall			453389400	4.06913e+08	366970764	14852149	89.7517

## Sheet: Table S2
Table S2. S. tuberosum genes that are upregulated at 2 and 3 days post inoculation (dpi).
Upregulated Genes at 2 dpi			Upregulated Genes at 3 dpi			Common Genes
Gene ID	log2 Fold Change	adjusted p value	Gene ID	log2 Fold Change	adjusted p value	Gene ID	Putative Functions
Soltu.DM.01G002130	2.64297	0.000123676	Soltu.DM.01G000220	2.9576	5.52501e-05	Soltu.DM.09G004550	Late embryogenesis abundant protein-related
Soltu.DM.01G002530	4.95439	0.0458481	Soltu.DM.01G002130	2.77481	2.54015e-05	Soltu.DM.02G018790	Unknown
Soltu.DM.01G002600	2.09992	0.00289363	Soltu.DM.01G002540	1.80716	1.49126e-17	Soltu.DM.06G034120	Subtilase family protein
Soltu.DM.01G002750	2.66782	0.00675703	Soltu.DM.01G002600	1.48222	0.0276544	Soltu.DM.02G016490	Unknown
Soltu.DM.01G002760	2.45771	0.00310472	Soltu.DM.01G003010	2.34501	0.000410985	Soltu.DM.01G002130	FAF-like chloroplast protein
Soltu.DM.01G002770	1.51349	0.00208649	Soltu.DM.01G003820	2.18805	0.0068173	Soltu.DM.09G028080	Sphingolipid biosynthesis protein
Soltu.DM.01G006880	2.23725	0.0287811	Soltu.DM.01G003880	3.80377	4.55186e-07	Soltu.DM.06G028000	Hydroxysteroid dehydrogenase
Soltu.DM.01G009180	3.62732	0.0297996	Soltu.DM.01G005520	1.95578	0.029209	Soltu.DM.11G005490	UDP-glucosyl transferase 72B3
Soltu.DM.01G009330	3.09588	0.000113353	Soltu.DM.01G006880	2.88778	0.00202625	Soltu.DM.09G031020	UDP-glucosyl transferase 72B3
Soltu.DM.01G009370	5.37635	0.00504826	Soltu.DM.01G007520	3.01863	0.00379094	Soltu.DM.01G028410	Cys/His-rich C1 domain family protein
Soltu.DM.01G015910	4.38762	0.0387986	Soltu.DM.01G008530	6.54199	3.23551e-05	Soltu.DM.07G012990	Integrase-type DNA-binding protein
Soltu.DM.01G019830	2.65344	0.0477046	Soltu.DM.01G009150	7.73413	9.71898e-08	Soltu.DM.10G015440	Redox responsive TF
Soltu.DM.01G020810	6.09113	0.0011172	Soltu.DM.01G009300	1.34143	0.00666159	Soltu.DM.03G023970	Beta-tonoplast intrinsic protein
Soltu.DM.01G024170	4.86838	0.0406802	Soltu.DM.01G010560	1.59105	0.00834209	Soltu.DM.09G007240	Putative membrane-associated kinase
Soltu.DM.01G027980	2.09101	0.000814798	Soltu.DM.01G011140	1.50292	8.75713e-07	Soltu.DM.12G009250	TM-CC/RLP (see Figure 5)
Soltu.DM.01G028300	3.57525	0.000122421	Soltu.DM.01G011740	1.85248	3.88997e-08	Soltu.DM.03G032570	EF-TU receptor (see Figure 5, Table 1)
Soltu.DM.01G028330	3.37995	0.0105916	Soltu.DM.01G012530	1.58348	0.00218861	Soltu.DM.07G023500	Unknown
Soltu.DM.01G028390	1.20385	0.000563259	Soltu.DM.01G013550	1.75721	0.00912807	Soltu.DM.03G020230	Hydroxysteroid dehydrogenase
Soltu.DM.01G028410	1.29765	0.0341359	Soltu.DM.01G016040	1.52783	1.16314e-05	Soltu.DM.05G011720	BURP domain containing protein
Soltu.DM.01G028440	3.22928	0.0160982	Soltu.DM.01G018160	2.21094	0.0348642	Soltu.DM.12G014570	Strictosidine synthase
Soltu.DM.01G029440	2.06215	5.35166e-07	Soltu.DM.01G018930	2.15779	0.000988383	Soltu.DM.01G002600	Glutaredoxin family protein
Soltu.DM.01G030170	2.97465	0.000152092	Soltu.DM.01G019750	5.80847	0.00161745	Soltu.DM.01G006880	Lipid transport family protein
Soltu.DM.01G032390	4.74591	0.00351962	Soltu.DM.01G021130	1.60105	0.00915271	Soltu.DM.07G020570	Late embryogenesis abundant protein-related
Soltu.DM.01G033810	1.56476	0.0197156	Soltu.DM.01G021620	2.22189	0.00244601	Soltu.DM.05G011700	BURP domain containing protein
Soltu.DM.01G036710	1.95048	0.0136751	Soltu.DM.01G021770	6.16637	1.1794e-07	Soltu.DM.09G007290	Exocyst subunit exo70 protein
Soltu.DM.01G044100	3.12699	0.00942431	Soltu.DM.01G022230	8.06074	4.90147e-08	Soltu.DM.04G002900	MLP (PR10)-like protein
Soltu.DM.01G046530	5.78432	0.0022736	Soltu.DM.01G023030	1.87842	0.0489638	Soltu.DM.04G001380	AP2/B3 TF
Soltu.DM.01G047760	1.68359	0.0403419	Soltu.DM.01G023270	1.5661	0.000945273	Soltu.DM.06G028090	Syntaxin
Soltu.DM.01G048780	4.85865	0.00575182	Soltu.DM.01G024870	2.3609	0.00143815	Soltu.DM.02G021850	Myb domain TF
Soltu.DM.01G049200	1.67573	0.000982021	Soltu.DM.01G025100	3.75042	0.000459808	Soltu.DM.06G020800	GDSL-like lipase/acylhydrolase
Soltu.DM.02G001870	2.43869	5.77749e-06	Soltu.DM.01G026270	2.45603	1.32979e-07	Soltu.DM.09G019920	Ovate family protein
Soltu.DM.02G006150	3.44625	0.0208805	Soltu.DM.01G026300	1.93995	0.000398177	Soltu.DM.11G019060	Unknown
Soltu.DM.02G011190	2.18125	0.000273626	Soltu.DM.01G026530	1.4165	0.0189861	Soltu.DM.11G025860	Nitrate excretion transporter 1
Soltu.DM.02G013490	2.09578	0.0163201	Soltu.DM.01G028350	5.65188	0.000857262	Soltu.DM.02G028930	Redox responsive TF
Soltu.DM.02G014830	7.45074	4.59252e-07	Soltu.DM.01G028390	2.6622	3.93563e-11	Soltu.DM.08G024160	Ethylene Responsive binding factor
Soltu.DM.02G015220	2.62206	0.00013103	Soltu.DM.01G028410	1.94326	0.00521256	Soltu.DM.06G012610	Plant invertase/pectin methylesterase
Soltu.DM.02G015380	1.75371	0.000423443	Soltu.DM.01G028600	7.8264	1.5245e-08	Soltu.DM.03G012570	Ethylene Insensitive 3 family protein
Soltu.DM.02G015470	5.48743	0.00665426	Soltu.DM.01G028670	7.18161	5.40365e-08	Soltu.DM.12G003640	Polyketide synthase, enoylreductase
Soltu.DM.02G015830	5.28579	0.00358536	Soltu.DM.01G028760	1.23797	2.95952e-06	Soltu.DM.12G010960	Too many mouths (see Figure 5 Table 1)
Soltu.DM.02G016010	1.2217	0.0350711	Soltu.DM.01G029130	2.19876	1.34028e-05	Soltu.DM.11G012620	Late embryogenesis abundant protein-related
Soltu.DM.02G016340	2.0395	1.72142e-05	Soltu.DM.01G029310	1.25884	0.00857794	Soltu.DM.02G017750	Heat Shock TF B2A
Soltu.DM.02G016490	6.45244	5.59648e-05	Soltu.DM.01G031190	7.04496	2.75891e-07	Soltu.DM.02G019930	Cytochrome P450 family protein
Soltu.DM.02G017570	2.51796	0.00108597	Soltu.DM.01G031370	1.91538	0.024977	Soltu.DM.08G023980	HXXXD-type acyl-transferase
Soltu.DM.02G017750	3.27283	1.39189e-05	Soltu.DM.01G031470	1.53028	2.08891e-05	Soltu.DM.02G028070	Auxin-responsive GH3 family protein
Soltu.DM.02G018790	2.94245	6.25351e-05	Soltu.DM.01G031690	1.47259	9.78485e-06	Soltu.DM.06G034500	3-ketoacyl-CoA synthase
Soltu.DM.02G019340	5.538	0.0129218	Soltu.DM.01G032120	1.58158	0.000529644	Soltu.DM.11G005440	UDP-Glycosyltransferase
Soltu.DM.02G019460	6.78726	0.000836464	Soltu.DM.01G032320	1.24803	1.70718e-06	Soltu.DM.10G015280	Cupredoxin
Soltu.DM.02G019930	2.04107	1.16846e-05	Soltu.DM.01G032560	4.65888	6.95354e-07	Soltu.DM.11G018040	NIMA-related kinase
Soltu.DM.02G020370	1.72618	0.0070568	Soltu.DM.01G033600	1.43581	0.0444105	Soltu.DM.05G025790	Ovate family protein
Soltu.DM.02G021380	1.91944	1.39963e-06	Soltu.DM.01G034260	1.65168	3.23673e-11	Soltu.DM.10G015290	Unknown
Soltu.DM.02G021850	2.19861	0.0488594	Soltu.DM.01G034290	1.29981	0.000933763	Soltu.DM.02G030370	bZIP42
Soltu.DM.02G026500	1.96704	0.0183968	Soltu.DM.01G034550	3.19256	0.00582144	Soltu.DM.10G008880	Squamosa promoter binding protein-like
Soltu.DM.02G026610	1.61625	0.0247555	Soltu.DM.01G034720	1.5018	0.000626758	Soltu.DM.09G024910	RLP (see Figure 5)
Soltu.DM.02G027440	4.53522	0.0453139	Soltu.DM.01G034870	6.26107	0.000686671	Soltu.DM.01G028390	Cys/His-rich C1 domain family protein
Soltu.DM.02G028070	2.28053	1.17937e-07	Soltu.DM.01G035240	3.34477	0.00042694	Soltu.DM.12G029360	ABC-2 transporter (see Figure 5, Table 1)
Soltu.DM.02G028560	1.81755	1.35345e-05	Soltu.DM.01G035610	3.28154	6.34233e-06	Soltu.DM.03G013460	Seven transmembrane MLO family protein
Soltu.DM.02G028930	2.53218	0.0386446	Soltu.DM.01G035620	1.88894	7.92684e-05	Soltu.DM.05G027190	NAC104-like, xylem NAC TF
Soltu.DM.02G030370	1.9471	0.000429478	Soltu.DM.01G038970	4.90494	0.0184245	Soltu.DM.02G014830	Oil-body associated protein 2C-like
Soltu.DM.02G030860	3.12995	0.00187727	Soltu.DM.01G040640	4.12536	0.00011017	Soltu.DM.12G002070	Late embryogenesis abundant protein-related
Soltu.DM.02G031060	3.10661	0.0252568	Soltu.DM.01G041090	2.76189	0.000898256	Soltu.DM.05G007620	GAST1 protein homolog
Soltu.DM.02G031700	1.94457	0.000125055	Soltu.DM.01G042390	1.46025	0.0089953	Soltu.DM.01G047760	Redox responsive TF
Soltu.DM.03G001930	1.82289	2.94743e-05	Soltu.DM.01G043240	3.22063	0.00158439	Soltu.DM.08G023270	Invertase/pectin methylestrase inhibitor
Soltu.DM.03G002110	1.43548	0.000182653	Soltu.DM.01G043280	1.92214	5.08565e-05	Soltu.DM.03G012120	UDP-glucosyl transferase 85A2
Soltu.DM.03G002450	5.88617	0.000281483	Soltu.DM.01G045480	1.93127	4.74715e-05	Soltu.DM.08G000040	MATE efflux family
Soltu.DM.03G002620	1.2958	0.0184478	Soltu.DM.01G046640	2.19933	1.91052e-06	Soltu.DM.06G012940	MATE efflux family
Soltu.DM.03G004180	2.93322	0.000143946	Soltu.DM.01G046670	2.88792	0.00292858	Soltu.DM.09G028330	Unknown
Soltu.DM.03G006460	2.103	2.54832e-09	Soltu.DM.01G047760	1.70909	0.0349703	Soltu.DM.03G030490	Late embryogenesis abundant protein-related
Soltu.DM.03G008210	2.77358	7.59156e-08	Soltu.DM.01G047840	4.39942	8.55785e-06	Soltu.DM.02G030860	Endonuclease-like family protein
Soltu.DM.03G012120	1.75994	0.00125885	Soltu.DM.01G048940	1.55067	0.00879209	Soltu.DM.03G008210	Cytochrome P450 family protein
Soltu.DM.03G012570	3.78609	0.000507389	Soltu.DM.01G049470	7.03934	1.74463e-07	Soltu.DM.12G008630	Exocyst subunit exo70 protein
Soltu.DM.03G013460	1.84972	3.5476e-05	Soltu.DM.01G049510	3.28563	0.000152504	Soltu.DM.12G014070	Fatty acid amide hydrolase
Soltu.DM.03G013870	1.49724	5.21847e-07	Soltu.DM.01G050010	2.37429	0.0305572	Soltu.DM.03G001930	Ethylene Responsive binding factor
Soltu.DM.03G019070	2.53346	0.0103264	Soltu.DM.01G050860	2.21911	0.03369	Soltu.DM.11G010780	2-oxoglutarate, Fe-dependent oxygenase
Soltu.DM.03G020230	1.40709	0.0329659	Soltu.DM.01G051530	1.92766	0.000129017
Soltu.DM.03G022860	2.10785	0.0360469	Soltu.DM.01G051680	1.99953	5.71509e-08
Soltu.DM.03G023970	2.18965	1.06076e-06	Soltu.DM.01G051880	5.26039	0.0122946
Soltu.DM.03G025600	1.34952	0.000578834	Soltu.DM.02G000210	2.4646	0.00839531
Soltu.DM.03G027830	4.97553	0.0340832	Soltu.DM.02G000950	2.22077	3.10289e-06
Soltu.DM.03G030490	4.80438	0.0192439	Soltu.DM.02G001090	2.71639	3.80091e-23
Soltu.DM.03G032570	2.36876	0.00171325	Soltu.DM.02G002140	2.29841	0.0494558
Soltu.DM.03G036600	1.78796	0.0382704	Soltu.DM.02G003360	5.96509	0.00640911
Soltu.DM.04G000440	3.01168	0.00249656	Soltu.DM.02G004410	3.45478	1.51182e-11
Soltu.DM.04G001020	4.76112	0.014457	Soltu.DM.02G004560	5.66839	0.00318904
Soltu.DM.04G001380	2.94158	4.1364e-06	Soltu.DM.02G004880	1.55102	0.0271415
Soltu.DM.04G002060	4.52117	0.0249757	Soltu.DM.02G006090	2.8577	0.0325904
Soltu.DM.04G002320	5.07419	0.00923525	Soltu.DM.02G006100	2.49648	2.67078e-06
Soltu.DM.04G002900	2.4651	0.00343499	Soltu.DM.02G006110	1.81926	0.00241564
Soltu.DM.04G006850	2.48504	0.00595185	Soltu.DM.02G006140	2.25934	0.00334727
Soltu.DM.04G007130	6.17264	2.10155e-05	Soltu.DM.02G006620	3.87272	7.22934e-09
Soltu.DM.04G008580	5.7431	0.0461959	Soltu.DM.02G006670	6.97025	0.000320445
Soltu.DM.04G008780	6.02482	0.0215705	Soltu.DM.02G006680	2.71008	6.49088e-05
Soltu.DM.04G010940	5.08398	0.00517824	Soltu.DM.02G006690	4.77036	5.98533e-07
Soltu.DM.04G011570	3.65018	0.00381259	Soltu.DM.02G006700	3.53888	2.13144e-24
Soltu.DM.04G021880	2.18169	3.82658e-06	Soltu.DM.02G008070	3.49234	1.00108e-06
Soltu.DM.04G022930	4.67568	0.0423161	Soltu.DM.02G008160	1.71191	1.13404e-11
Soltu.DM.04G027680	2.69979	0.000141935	Soltu.DM.02G008750	1.55198	0.000348976
Soltu.DM.04G033030	1.76888	0.00542219	Soltu.DM.02G012110	1.29951	0.0265531
Soltu.DM.04G034860	4.79399	8.13563e-06	Soltu.DM.02G013110	2.30806	2.22891e-06
Soltu.DM.04G035590	2.00449	0.00231014	Soltu.DM.02G014350	1.26023	0.00307852
Soltu.DM.04G037430	3.38847	0.0342419	Soltu.DM.02G014830	1.77777	0.0317952
Soltu.DM.05G000220	3.0637	0.00410732	Soltu.DM.02G015580	1.34868	0.0102655
Soltu.DM.05G001710	2.77642	1.66738e-05	Soltu.DM.02G016020	5.46909	0.0132934
Soltu.DM.05G002990	4.6057	0.0266846	Soltu.DM.02G016040	1.80972	2.02066e-06
Soltu.DM.05G003160	4.86965	0.0157551	Soltu.DM.02G016050	1.73231	0.00702227
Soltu.DM.05G003290	1.33587	0.023293	Soltu.DM.02G016490	2.65711	0.00965443
Soltu.DM.05G005510	2.67495	0.0160172	Soltu.DM.02G017750	2.25811	0.000445466
Soltu.DM.05G007620	6.39272	0.00283347	Soltu.DM.02G018070	1.61908	3.00585e-07
Soltu.DM.05G007980	2.02417	0.0146928	Soltu.DM.02G018650	1.71745	0.0037821
Soltu.DM.05G009930	5.89468	0.00125135	Soltu.DM.02G018790	4.37671	5.63966e-10
Soltu.DM.05G011700	5.40162	0.00034143	Soltu.DM.02G019780	4.5648	4.48872e-06
Soltu.DM.05G011720	4.641	0.015883	Soltu.DM.02G019930	1.79897	1.88828e-05
Soltu.DM.05G011890	1.51022	0.0285689	Soltu.DM.02G020290	1.26113	0.000886031
Soltu.DM.05G017930	1.52056	4.1364e-06	Soltu.DM.02G020410	2.59703	0.000713241
Soltu.DM.05G018810	3.80845	6.62326e-05	Soltu.DM.02G020440	1.32632	0.0371286
Soltu.DM.05G021240	1.21352	0.0455072	Soltu.DM.02G021850	3.74959	4.27158e-05
Soltu.DM.05G021710	1.39073	0.0216106	Soltu.DM.02G022050	1.84669	0.00377568
Soltu.DM.05G025790	1.32605	0.0096081	Soltu.DM.02G023010	5.5947	0.00724055
Soltu.DM.05G026190	1.95541	0.0481196	Soltu.DM.02G023430	4.61178	0.0178546
Soltu.DM.05G027190	2.75212	0.048542	Soltu.DM.02G023570	2.16404	0.0172704
Soltu.DM.06G000580	2.1212	0.00473101	Soltu.DM.02G023910	4.31452	0.0210455
Soltu.DM.06G000660	5.94078	0.00248178	Soltu.DM.02G024030	1.5495	0.00608498
Soltu.DM.06G002370	2.54355	0.00702226	Soltu.DM.02G024390	1.61379	0.00723675
Soltu.DM.06G002550	5.67462	0.00225756	Soltu.DM.02G024790	1.52289	0.00113344
Soltu.DM.06G002830	2.08185	0.0182785	Soltu.DM.02G025250	1.83129	0.0324595
Soltu.DM.06G003350	5.23395	0.0173324	Soltu.DM.02G026070	3.5771	0.00622086
Soltu.DM.06G004000	1.73424	0.000430646	Soltu.DM.02G026480	1.67717	0.000575887
Soltu.DM.06G004280	1.2204	0.00187247	Soltu.DM.02G026860	2.16209	0.000305566
Soltu.DM.06G010640	1.64122	0.00812838	Soltu.DM.02G027330	2.62035	0.00024768
Soltu.DM.06G012470	2.19816	0.000410055	Soltu.DM.02G027350	2.16923	2.76514e-11
Soltu.DM.06G012610	1.25518	0.0347065	Soltu.DM.02G027490	6.79536	5.43325e-06
Soltu.DM.06G012940	2.09555	0.0327053	Soltu.DM.02G028070	1.35488	0.00181812
Soltu.DM.06G016940	6.48239	0.00960353	Soltu.DM.02G028790	5.47004	0.00199176
Soltu.DM.06G016970	6.02727	0.0267794	Soltu.DM.02G028880	2.19237	0.000385813
Soltu.DM.06G017540	4.68137	0.0241103	Soltu.DM.02G028930	4.37025	0.00341953
Soltu.DM.06G020800	1.76702	0.0121103	Soltu.DM.02G029070	7.20333	0.0370233
Soltu.DM.06G022930	2.28009	0.00247887	Soltu.DM.02G029080	9.47039	6.83145e-13
Soltu.DM.06G023530	1.39626	0.00934686	Soltu.DM.02G029650	1.34496	0.0350985
Soltu.DM.06G024830	2.09668	8.0884e-07	Soltu.DM.02G030370	2.0198	1.25312e-05
Soltu.DM.06G025080	1.27058	0.00374837	Soltu.DM.02G030860	2.46532	0.00231917
Soltu.DM.06G027430	3.78584	0.026092	Soltu.DM.02G032210	1.2138	0.0148471
Soltu.DM.06G028000	2.45402	0.000615644	Soltu.DM.02G032220	2.00813	2.88129e-07
Soltu.DM.06G028090	2.22325	0.0151759	Soltu.DM.02G033030	1.72712	4.4739e-06
Soltu.DM.06G028370	1.21149	0.0085915	Soltu.DM.02G034530	7.05769	9.90987e-06
Soltu.DM.06G029520	5.38795	0.000177088	Soltu.DM.02G034660	2.26254	0.0224477
Soltu.DM.06G029890	3.25161	0.000350358	Soltu.DM.03G000960	1.88762	6.64009e-15
Soltu.DM.06G031600	5.09753	0.0280806	Soltu.DM.03G001760	6.17533	0.0367463
Soltu.DM.06G032730	8.30636	2.06637e-10	Soltu.DM.03G001900	1.76495	0.00228703
Soltu.DM.06G033600	5.91196	1.92102e-09	Soltu.DM.03G001910	3.45314	1.13128e-24
Soltu.DM.06G034100	2.82186	0.0231028	Soltu.DM.03G001930	2.55611	3.3256e-12
Soltu.DM.06G034120	2.9974	7.43726e-08	Soltu.DM.03G002390	3.13721	0.0187593
Soltu.DM.06G034500	5.56768	0.00833814	Soltu.DM.03G003010	3.83369	0.0157108
Soltu.DM.07G001040	5.06971	2.41424e-05	Soltu.DM.03G003400	2.64426	0.0279833
Soltu.DM.07G001110	1.90238	0.0170782	Soltu.DM.03G003420	1.24569	0.0309519
Soltu.DM.07G001420	1.68974	0.0474107	Soltu.DM.03G004110	5.01709	0.00418486
Soltu.DM.07G001810	1.53262	0.0220837	Soltu.DM.03G004160	1.33817	0.000362457
Soltu.DM.07G003260	1.23661	0.0175122	Soltu.DM.03G004670	7.53564	4.60739e-08
Soltu.DM.07G005410	6.65586	0.000902373	Soltu.DM.03G004740	2.62923	0.00237825
Soltu.DM.07G006980	1.97146	0.0309842	Soltu.DM.03G004950	2.07311	0.013709
Soltu.DM.07G011900	1.35157	0.0192765	Soltu.DM.03G005480	1.62634	2.86956e-06
Soltu.DM.07G012990	3.00426	0.0315644	Soltu.DM.03G005570	1.21867	0.0020461
Soltu.DM.07G013340	7.54948	1.64225e-07	Soltu.DM.03G005600	3.88399	0.000286381
Soltu.DM.07G015090	3.42327	0.0204988	Soltu.DM.03G005910	5.08525	0.00768387
Soltu.DM.07G017800	1.86438	0.00836799	Soltu.DM.03G005930	2.72353	1.62107e-17
Soltu.DM.07G017940	5.02917	0.00881635	Soltu.DM.03G006070	8.33034	1.23601e-10
Soltu.DM.07G018770	1.80878	0.0228482	Soltu.DM.03G007930	1.51363	4.4e-06
Soltu.DM.07G020570	5.06583	1.70825e-21	Soltu.DM.03G008210	2.05476	4.72437e-05
Soltu.DM.07G023500	5.31501	0.0245544	Soltu.DM.03G009280	1.74947	7.12021e-05
Soltu.DM.07G026340	4.00885	0.00987237	Soltu.DM.03G009690	5.67929	0.0277264
Soltu.DM.08G000040	2.17021	0.0258965	Soltu.DM.03G011060	1.62319	3.32305e-06
Soltu.DM.08G000070	2.26125	0.0195822	Soltu.DM.03G011410	1.60695	0.000116479
Soltu.DM.08G003220	2.15761	0.0252624	Soltu.DM.03G011660	2.664	0.00235221
Soltu.DM.08G005120	5.1292	0.000480797	Soltu.DM.03G012110	2.34957	0.00207049
Soltu.DM.08G005160	2.01353	0.0251559	Soltu.DM.03G012120	1.8555	8.18052e-05
Soltu.DM.08G007170	2.70599	0.00783277	Soltu.DM.03G012550	5.86691	0.000256246
Soltu.DM.08G013850	6.76307	0.022428	Soltu.DM.03G012570	2.00143	0.0399879
Soltu.DM.08G022510	4.57596	0.0261703	Soltu.DM.03G012610	1.20121	3.49451e-05
Soltu.DM.08G023270	1.42546	0.0181693	Soltu.DM.03G013070	1.41742	0.0134988
Soltu.DM.08G023980	2.60215	0.0054684	Soltu.DM.03G013100	4.02827	0.000892073
Soltu.DM.08G024160	1.86504	0.00717244	Soltu.DM.03G013460	2.6675	1.3772e-10
Soltu.DM.08G027530	4.92849	0.0357447	Soltu.DM.03G015100	2.42852	0.000110996
Soltu.DM.08G028100	2.31652	2.33854e-06	Soltu.DM.03G016170	1.22978	6.31112e-06
Soltu.DM.09G000910	1.64855	0.0161881	Soltu.DM.03G016230	1.38118	0.000120754
Soltu.DM.09G003510	2.87645	0.00158615	Soltu.DM.03G016740	2.13653	0.000144704
Soltu.DM.09G004550	6.14261	0.000228493	Soltu.DM.03G016750	4.04017	0.00690043
Soltu.DM.09G006390	2.88591	0.00266743	Soltu.DM.03G018780	2.11284	1.80768e-07
Soltu.DM.09G007240	1.7205	0.0228587	Soltu.DM.03G019380	1.82013	0.000151661
Soltu.DM.09G007280	1.79328	4.38985e-07	Soltu.DM.03G019590	1.31732	4.3613e-07
Soltu.DM.09G007290	2.34136	0.000127901	Soltu.DM.03G019710	1.57071	0.00582865
Soltu.DM.09G011310	4.82618	0.0322319	Soltu.DM.03G020230	2.0835	0.000662224
Soltu.DM.09G017090	1.77048	0.0402245	Soltu.DM.03G020240	4.33573	0.0103914
Soltu.DM.09G018290	3.87443	0.00289149	Soltu.DM.03G021420	3.12576	1.30192e-07
Soltu.DM.09G019440	1.33118	1.48768e-05	Soltu.DM.03G021710	4.90662	7.3349e-09
Soltu.DM.09G019920	4.13558	0.0396759	Soltu.DM.03G022880	5.70056	0.000791192
Soltu.DM.09G021450	5.3166	0.0012899	Soltu.DM.03G023070	1.41663	8.50979e-07
Soltu.DM.09G024550	1.50417	0.046774	Soltu.DM.03G023970	2.09575	1.44614e-06
Soltu.DM.09G024910	4.27952	0.0123205	Soltu.DM.03G025580	1.42518	0.00136386
Soltu.DM.09G026500	3.1235	0.0126849	Soltu.DM.03G026040	1.2384	0.0209532
Soltu.DM.09G028080	4.76519	0.0415403	Soltu.DM.03G027010	5.71227	0.0133034
Soltu.DM.09G028330	1.8596	0.0026199	Soltu.DM.03G027130	5.65378	0.0020363
Soltu.DM.09G030390	2.11633	0.00173027	Soltu.DM.03G027920	1.42206	0.000633232
Soltu.DM.09G030580	2.98908	0.0478941	Soltu.DM.03G027930	1.74176	0.00366465
Soltu.DM.09G030820	2.43751	0.0107783	Soltu.DM.03G028140	5.12703	8.10782e-05
Soltu.DM.09G031020	3.44593	0.00383911	Soltu.DM.03G028440	5.32822	0.00618606
Soltu.DM.10G000360	1.63493	0.0434278	Soltu.DM.03G028620	2.78452	0.0387423
Soltu.DM.10G000520	3.16318	3.09459e-07	Soltu.DM.03G028680	4.46612	0.0490289
Soltu.DM.10G003790	2.98919	0.00136331	Soltu.DM.03G028700	3.16064	5.30805e-05
Soltu.DM.10G005360	1.87047	0.00017668	Soltu.DM.03G029050	2.01159	0.00726518
Soltu.DM.10G006870	1.55425	0.0470441	Soltu.DM.03G030490	6.14749	0.000666843
Soltu.DM.10G008360	5.67323	0.000164455	Soltu.DM.03G030910	2.76852	2.36155e-13
Soltu.DM.10G008880	1.31633	0.00811251	Soltu.DM.03G030920	5.91642	0.00877069
Soltu.DM.10G011320	4.69563	0.0117397	Soltu.DM.03G031550	5.69874	7.28955e-06
Soltu.DM.10G015240	2.221	4.8977e-05	Soltu.DM.03G031720	1.42217	6.82336e-05
Soltu.DM.10G015280	3.31719	4.41871e-05	Soltu.DM.03G032570	2.13213	0.000695725
Soltu.DM.10G015290	5.27555	2.54138e-05	Soltu.DM.03G033140	1.30786	4.82483e-05
Soltu.DM.10G015440	3.39555	0.00269481	Soltu.DM.03G033520	1.81908	6.76038e-08
Soltu.DM.10G017570	2.5457	0.037273	Soltu.DM.03G034330	2.73512	0.0270111
Soltu.DM.10G019630	1.61073	0.0188508	Soltu.DM.03G034600	1.21328	0.024977
Soltu.DM.10G021820	2.52173	0.0428285	Soltu.DM.03G035890	6.56099	6.53062e-05
Soltu.DM.11G004280	2.82105	0.00358127	Soltu.DM.03G036480	2.11643	0.00789465
Soltu.DM.11G005440	2.29423	2.87732e-06	Soltu.DM.03G036860	1.31282	0.0419612
Soltu.DM.11G005450	2.13002	0.00739787	Soltu.DM.03G037380	4.16536	3.23973e-05
Soltu.DM.11G005490	2.10994	0.0185913	Soltu.DM.04G000170	3.72814	1.66498e-07
Soltu.DM.11G006200	5.25956	0.00305521	Soltu.DM.04G000660	5.67036	0.00063452
Soltu.DM.11G007960	2.46004	1.73509e-05	Soltu.DM.04G001310	1.35436	0.0226789
Soltu.DM.11G008150	5.92302	0.00129259	Soltu.DM.04G001380	2.74172	2.22389e-08
Soltu.DM.11G008170	3.68159	4.10296e-06	Soltu.DM.04G001890	2.9692	0.000531147
Soltu.DM.11G009040	3.64558	0.0170293	Soltu.DM.04G002580	2.21336	0.000537192
Soltu.DM.11G009590	1.89704	0.000104357	Soltu.DM.04G002900	1.80039	0.0186845
Soltu.DM.11G010690	3.84261	3.46275e-05	Soltu.DM.04G003190	1.4031	0.011302
Soltu.DM.11G010780	1.78476	8.22498e-05	Soltu.DM.04G003450	7.72527	8.57541e-09
Soltu.DM.11G012620	1.21547	0.000486982	Soltu.DM.04G005670	2.46964	1.78185e-12
Soltu.DM.11G013880	2.9039	0.00716894	Soltu.DM.04G005980	1.597	5.22428e-06
Soltu.DM.11G014840	5.47544	0.0289431	Soltu.DM.04G007240	4.67228	5.63132e-07
Soltu.DM.11G018040	1.84465	0.0029426	Soltu.DM.04G007930	1.49775	0.0421502
Soltu.DM.11G019060	2.39072	0.00396926	Soltu.DM.04G008110	1.82972	0.0475633
Soltu.DM.11G023240	8.6241	2.32125e-09	Soltu.DM.04G009270	1.85429	0.0094741
Soltu.DM.11G025860	5.48079	0.0232106	Soltu.DM.04G010350	2.13545	4.4621e-09
Soltu.DM.11G026530	2.94372	0.00845931	Soltu.DM.04G011110	1.456	0.00536413
Soltu.DM.12G001810	2.86682	0.0478941	Soltu.DM.04G012180	6.3454	1.63657e-05
Soltu.DM.12G002070	2.78148	1.55266e-08	Soltu.DM.04G016240	4.19685	0.00532179
Soltu.DM.12G003380	2.59729	0.00239488	Soltu.DM.04G018350	1.69859	0.0468844
Soltu.DM.12G003430	6.58283	0.000109195	Soltu.DM.04G020400	2.09446	0.0422654
Soltu.DM.12G003640	2.79405	0.0393078	Soltu.DM.04G020540	6.13547	0.000152602
Soltu.DM.12G003880	4.36276	0.0263889	Soltu.DM.04G021730	2.45443	8.96406e-08
Soltu.DM.12G004680	2.47719	0.0386446	Soltu.DM.04G024360	5.71018	0.000464769
Soltu.DM.12G006860	1.609	0.0139282	Soltu.DM.04G024820	4.48353	0.0418411
Soltu.DM.12G007220	6.47467	2.01775e-05	Soltu.DM.04G025230	2.19079	1.64601e-09
Soltu.DM.12G007320	5.28937	0.0198948	Soltu.DM.04G025750	3.72983	1.24061e-06
Soltu.DM.12G008630	1.74913	4.73055e-05	Soltu.DM.04G026270	1.77481	0.00151856
Soltu.DM.12G008740	2.01046	0.000120588	Soltu.DM.04G026840	1.98168	1.18149e-10
Soltu.DM.12G009250	4.98725	0.0373994	Soltu.DM.04G027160	2.61436	0.024195
Soltu.DM.12G010960	2.51473	0.000722693	Soltu.DM.04G027180	6.43604	0.00441114
Soltu.DM.12G011520	2.02736	0.043168	Soltu.DM.04G027560	5.96053	0.00361925
Soltu.DM.12G014070	1.46625	0.0260858	Soltu.DM.04G027570	4.60642	0.0250814
Soltu.DM.12G014570	1.68587	0.0272319	Soltu.DM.04G029680	1.96446	1.12634e-05
Soltu.DM.12G019660	5.15001	0.0361715	Soltu.DM.04G029990	6.17242	0.0100999
Soltu.DM.12G020960	6.74771	1.1974e-05	Soltu.DM.04G030600	3.93497	0.0239935
Soltu.DM.12G021710	2.84664	0.00128081	Soltu.DM.04G030940	1.47179	1.44006e-10
Soltu.DM.12G021720	2.97238	0.0202424	Soltu.DM.04G031330	3.16796	0.00474587
Soltu.DM.12G021820	5.87916	0.000422225	Soltu.DM.04G032500	1.61212	0.0317925
Soltu.DM.12G022300	4.61967	7.72989e-05	Soltu.DM.04G032760	4.52434	2.94137e-11
Soltu.DM.12G022930	1.6439	0.000887577	Soltu.DM.04G033460	1.38554	0.00111314
Soltu.DM.12G023080	2.84827	0.00151342	Soltu.DM.04G033520	4.23327	0.000168475
Soltu.DM.12G023110	6.36259	0.0142784	Soltu.DM.04G033540	1.82002	4.37678e-07
Soltu.DM.12G025190	1.24119	0.0131625	Soltu.DM.04G034170	6.46996	0.00131791
Soltu.DM.12G025820	4.60872	5.43301e-13	Soltu.DM.04G034450	3.81766	1.92176e-16
Soltu.DM.12G029360	3.63077	4.63741e-05	Soltu.DM.04G035160	5.01987	0.00134483
Soltu.DM.12G030170	1.23573	0.0033709	Soltu.DM.04G036370	2.72402	0.00355308
			Soltu.DM.04G036700	3.16053	0.000104948
			Soltu.DM.05G000420	1.50925	2.30743e-08
			Soltu.DM.05G000560	5.6663	0.0118775
			Soltu.DM.05G001560	2.03698	4.79885e-06
			Soltu.DM.05G002740	1.69438	0.00771377
			Soltu.DM.05G003080	1.75662	1.41876e-09
			Soltu.DM.05G003820	6.14822	0.0122946
			Soltu.DM.05G004430	1.20641	4.93317e-05
			Soltu.DM.05G004590	3.75049	0.0158559
			Soltu.DM.05G004620	1.6097	2.18087e-11
			Soltu.DM.05G004700	3.20083	1.10944e-08
			Soltu.DM.05G004980	1.81591	0.00189778
			Soltu.DM.05G006210	3.96291	0.0343865
			Soltu.DM.05G006500	2.65399	1.46778e-05
			Soltu.DM.05G006770	4.52908	2.0055e-20
			Soltu.DM.05G007510	6.30476	1.52807e-05
			Soltu.DM.05G007620	4.9306	0.0164583
			Soltu.DM.05G008840	4.16486	1.07374e-10
			Soltu.DM.05G010030	4.25865	1.47641e-06
			Soltu.DM.05G010260	1.60603	1.05294e-08
			Soltu.DM.05G010420	3.41017	7.36781e-05
			Soltu.DM.05G011530	5.11284	0.030349
			Soltu.DM.05G011700	8.77419	8.59093e-11
			Soltu.DM.05G011720	7.58537	4.49699e-06
			Soltu.DM.05G013050	2.52285	2.24886e-06
			Soltu.DM.05G018760	6.14318	0.0132934
			Soltu.DM.05G018910	4.00505	2.04891e-10
			Soltu.DM.05G019030	1.72759	0.000146791
			Soltu.DM.05G020210	2.19399	0.000845685
			Soltu.DM.05G020970	4.85369	5.27937e-09
			Soltu.DM.05G021130	1.85572	0.0460908
			Soltu.DM.05G021590	2.31552	2.56784e-09
			Soltu.DM.05G022930	6.5917	8.53574e-06
			Soltu.DM.05G023110	2.22265	0.000188303
			Soltu.DM.05G023620	7.39306	6.59609e-08
			Soltu.DM.05G024640	1.55674	0.0302609
			Soltu.DM.05G025730	4.21134	0.0269161
			Soltu.DM.05G025790	1.64067	0.00107235
			Soltu.DM.05G025860	4.50957	1.33528e-06
			Soltu.DM.05G025900	2.78597	0.00141411
			Soltu.DM.05G027190	3.26383	0.00539048
			Soltu.DM.06G001110	1.99841	1.00749e-07
			Soltu.DM.06G001380	1.93303	0.000201177
			Soltu.DM.06G002500	2.41662	2.67031e-11
			Soltu.DM.06G003390	5.70286	0.0141672
			Soltu.DM.06G003910	1.77257	3.4801e-13
			Soltu.DM.06G003920	1.71455	0.00185339
			Soltu.DM.06G005020	5.60074	0.0107737
			Soltu.DM.06G006480	4.20473	1.327e-06
			Soltu.DM.06G010180	1.43682	0.00227234
			Soltu.DM.06G011140	1.32967	0.000326845
			Soltu.DM.06G011650	2.02352	4.3126e-19
			Soltu.DM.06G012610	2.50178	0.000148978
			Soltu.DM.06G012690	2.00964	0.018105
			Soltu.DM.06G012710	2.54527	0.000229448
			Soltu.DM.06G012940	1.77594	0.0490261
			Soltu.DM.06G013840	1.61933	0.000235905
			Soltu.DM.06G014340	2.17818	0.000501965
			Soltu.DM.06G014510	4.71004	0.00777071
			Soltu.DM.06G015880	5.91532	0.00146754
			Soltu.DM.06G015970	4.83233	0.0269698
			Soltu.DM.06G016200	1.47747	6.5236e-05
			Soltu.DM.06G016740	4.27749	2.4025e-31
			Soltu.DM.06G016750	4.37568	1.58257e-20
			Soltu.DM.06G018280	6.88011	0.00172458
			Soltu.DM.06G018480	2.17957	0.0382956
			Soltu.DM.06G018550	6.40923	0.000205803
			Soltu.DM.06G018700	1.24596	1.95743e-06
			Soltu.DM.06G018740	6.14645	0.000892916
			Soltu.DM.06G019170	3.06041	4.87679e-05
			Soltu.DM.06G019270	1.69622	1.02706e-08
			Soltu.DM.06G019280	2.15306	2.34728e-06
			Soltu.DM.06G019360	4.00904	0.0324157
			Soltu.DM.06G019870	1.87056	0.001183
			Soltu.DM.06G020580	4.47311	0.00524917
			Soltu.DM.06G020800	3.0423	0.000119082
			Soltu.DM.06G021300	6.64732	3.88034e-05
			Soltu.DM.06G021750	2.96764	1.74266e-11
			Soltu.DM.06G021760	4.19901	0.0331355
			Soltu.DM.06G022470	3.21871	4.23424e-10
			Soltu.DM.06G022860	5.24319	0.0241545
			Soltu.DM.06G022970	6.44863	0.000633232
			Soltu.DM.06G023020	5.33123	0.0191699
			Soltu.DM.06G023490	3.62452	0.0175367
			Soltu.DM.06G023510	2.5042	0.000340713
			Soltu.DM.06G023860	1.55237	0.0258295
			Soltu.DM.06G024350	2.4759	0.014452
			Soltu.DM.06G025210	1.43179	0.00182795
			Soltu.DM.06G025680	1.91991	0.00136369
			Soltu.DM.06G026270	1.28121	0.00108462
			Soltu.DM.06G026450	1.99166	0.000441388
			Soltu.DM.06G026610	3.25952	1.96043e-13
			Soltu.DM.06G026620	2.35354	0.0282538
			Soltu.DM.06G027760	3.91158	1.0205e-07
			Soltu.DM.06G028000	2.39837	5.9038e-05
			Soltu.DM.06G028090	1.81073	0.0282398
			Soltu.DM.06G028250	1.74163	0.000328657
			Soltu.DM.06G029580	1.64222	2.61191e-05
			Soltu.DM.06G030200	3.32133	0.038456
			Soltu.DM.06G030210	1.26054	0.0470391
			Soltu.DM.06G030510	1.72423	0.000182952
			Soltu.DM.06G032060	9.36924	2.39537e-12
			Soltu.DM.06G032760	6.68116	0.00153589
			Soltu.DM.06G032960	2.08253	0.0344274
			Soltu.DM.06G034120	2.33966	6.69221e-05
			Soltu.DM.06G034350	5.76675	0.000617205
			Soltu.DM.06G034500	4.38788	0.0109917
			Soltu.DM.07G002000	3.44804	1.29218e-11
			Soltu.DM.07G002320	1.91445	2.14467e-12
			Soltu.DM.07G003420	3.01121	4.29153e-06
			Soltu.DM.07G004320	1.63899	1.83504e-08
			Soltu.DM.07G005300	1.50669	0.0365955
			Soltu.DM.07G007140	4.35542	1.6958e-06
			Soltu.DM.07G007150	5.6028	0.00449716
			Soltu.DM.07G009080	3.55467	6.16412e-08
			Soltu.DM.07G012990	2.81737	0.0265073
			Soltu.DM.07G014040	2.72119	4.67824e-12
			Soltu.DM.07G014140	3.23845	0.0323601
			Soltu.DM.07G014910	3.24345	1.18248e-10
			Soltu.DM.07G015310	4.92478	0.0112704
			Soltu.DM.07G015840	2.40109	0.0355219
			Soltu.DM.07G016740	5.89677	0.0121724
			Soltu.DM.07G017950	2.34691	0.000897797
			Soltu.DM.07G018090	1.36122	0.0332786
			Soltu.DM.07G018980	6.8587	0.0289267
			Soltu.DM.07G019250	1.88874	0.000330151
			Soltu.DM.07G019280	1.60302	2.8706e-07
			Soltu.DM.07G020410	1.42485	0.000450943
			Soltu.DM.07G020480	1.68415	7.13618e-06
			Soltu.DM.07G020570	3.44792	8.32221e-19
			Soltu.DM.07G020640	3.37411	0.0059574
			Soltu.DM.07G020970	1.31729	0.00453826
			Soltu.DM.07G020980	5.71984	0.000115877
			Soltu.DM.07G023020	1.69834	0.000381627
			Soltu.DM.07G023380	2.37949	0.00385154
			Soltu.DM.07G023500	4.70192	0.0313573
			Soltu.DM.07G023670	2.089	0.00183078
			Soltu.DM.07G023860	6.01645	0.000574442
			Soltu.DM.07G023900	1.39062	8.27906e-09
			Soltu.DM.07G024010	3.86985	7.00254e-08
			Soltu.DM.07G024550	3.68307	8.35133e-38
			Soltu.DM.07G026520	1.78174	7.0246e-05
			Soltu.DM.07G026820	6.3801	0.000126038
			Soltu.DM.07G027840	1.64258	9.16312e-05
			Soltu.DM.07G027940	1.48058	2.09264e-08
			Soltu.DM.07G028400	3.42311	0.00374562
			Soltu.DM.08G000040	3.86373	9.87741e-05
			Soltu.DM.08G000190	1.59387	0.0195947
			Soltu.DM.08G000980	1.50388	3.12721e-07
			Soltu.DM.08G001100	5.81871	0.0327217
			Soltu.DM.08G003570	1.72722	1.87981e-05
			Soltu.DM.08G005340	2.73761	0.0332534
			Soltu.DM.08G005510	1.74262	0.00757205
			Soltu.DM.08G005540	3.66528	3.59957e-33
			Soltu.DM.08G006890	2.0125	1.55324e-05
			Soltu.DM.08G008810	1.8268	4.04623e-11
			Soltu.DM.08G009350	2.23815	0.000689293
			Soltu.DM.08G010630	2.15065	6.11047e-07
			Soltu.DM.08G011430	1.557	2.23866e-13
			Soltu.DM.08G011770	1.55088	2.81452e-09
			Soltu.DM.08G015980	5.33609	0.0245154
			Soltu.DM.08G016190	2.3334	0.0107316
			Soltu.DM.08G018620	6.22351	9.74674e-06
			Soltu.DM.08G019610	2.92137	0.0224106
			Soltu.DM.08G019780	2.05172	0.000105554
			Soltu.DM.08G020180	2.25047	1.72851e-17
			Soltu.DM.08G021500	1.46743	5.63958e-06
			Soltu.DM.08G022020	1.64587	1.67326e-06
			Soltu.DM.08G022150	5.167	0.0338202
			Soltu.DM.08G022670	1.93392	0.00069272
			Soltu.DM.08G022840	3.15953	0.0025014
			Soltu.DM.08G022850	1.57285	5.24752e-05
			Soltu.DM.08G023200	1.31695	0.00306191
			Soltu.DM.08G023270	2.04814	0.000671914
			Soltu.DM.08G023520	1.3855	0.00204319
			Soltu.DM.08G023850	2.889	0.000230461
			Soltu.DM.08G023860	3.12087	0.0257002
			Soltu.DM.08G023970	8.16771	9.78194e-08
			Soltu.DM.08G023980	3.7509	2.62415e-11
			Soltu.DM.08G024160	2.33345	0.000154818
			Soltu.DM.08G024400	4.81501	0.0285865
			Soltu.DM.08G024640	3.0537	0.0317766
			Soltu.DM.08G025250	4.81902	0.00591524
			Soltu.DM.08G025560	2.23914	0.00201923
			Soltu.DM.08G026310	5.33404	0.00178428
			Soltu.DM.08G026930	1.56718	0.00222653
			Soltu.DM.08G027080	1.65397	4.77096e-07
			Soltu.DM.08G028390	2.58648	0.0426201
			Soltu.DM.08G028560	3.97165	7.40824e-05
			Soltu.DM.08G028610	1.41399	9.40606e-05
			Soltu.DM.08G028890	2.28368	0.000868954
			Soltu.DM.09G000560	2.546	0.00571896
			Soltu.DM.09G000580	6.01156	0.00258183
			Soltu.DM.09G001400	2.41226	0.0229522
			Soltu.DM.09G001410	1.77446	0.0435827
			Soltu.DM.09G001600	1.20399	4.54613e-05
			Soltu.DM.09G002920	1.87445	5.61878e-06
			Soltu.DM.09G003100	6.44871	0.00127959
			Soltu.DM.09G003210	2.10702	4.6258e-05
			Soltu.DM.09G003230	1.46915	4.16744e-06
			Soltu.DM.09G003990	4.05582	7.19774e-07
			Soltu.DM.09G004400	6.82334	6.08897e-07
			Soltu.DM.09G004550	4.41812	0.000727012
			Soltu.DM.09G004590	1.77298	0.00803697
			Soltu.DM.09G004710	1.66174	1.90203e-12
			Soltu.DM.09G005200	4.04378	0.00161106
			Soltu.DM.09G005650	6.99667	7.74356e-06
			Soltu.DM.09G005660	1.50287	0.0372369
			Soltu.DM.09G007240	5.32112	4.82504e-07
			Soltu.DM.09G007290	1.30887	0.0281876
			Soltu.DM.09G007640	1.4647	0.00220465
			Soltu.DM.09G007900	8.09851	1.75246e-07
			Soltu.DM.09G008890	2.42039	0.0403899
			Soltu.DM.09G009130	3.91219	1.15596e-32
			Soltu.DM.09G009560	1.51156	9.47654e-08
			Soltu.DM.09G010000	6.1391	7.09822e-17
			Soltu.DM.09G016240	2.60972	0.00172849
			Soltu.DM.09G017520	5.88397	0.00211548
			Soltu.DM.09G019720	1.3106	0.000245327
			Soltu.DM.09G019800	3.64941	0.0105493
			Soltu.DM.09G019920	6.80281	5.33575e-05
			Soltu.DM.09G020080	1.36227	0.00732119
			Soltu.DM.09G020100	1.73373	0.00186411
			Soltu.DM.09G020360	1.30751	6.10564e-09
			Soltu.DM.09G020400	1.24188	0.000277784
			Soltu.DM.09G020480	7.06344	4.68527e-07
			Soltu.DM.09G021150	5.01281	0.000120679
			Soltu.DM.09G021260	3.86134	6.2847e-07
			Soltu.DM.09G021350	2.92561	0.00524975
			Soltu.DM.09G021800	4.01519	0.0120351
			Soltu.DM.09G022360	2.75205	0.0068173
			Soltu.DM.09G022760	5.25744	0.012334
			Soltu.DM.09G023910	2.28744	0.00588779
			Soltu.DM.09G024210	1.75385	1.69878e-06
			Soltu.DM.09G024720	6.404	0.000791491
			Soltu.DM.09G024770	2.17912	4.08009e-09
			Soltu.DM.09G024910	7.94653	3.31748e-08
			Soltu.DM.09G024990	6.09485	0.000143117
			Soltu.DM.09G025340	1.43655	6.92796e-06
			Soltu.DM.09G026000	3.62506	0.0491214
			Soltu.DM.09G026420	5.46158	0.0422425
			Soltu.DM.09G027000	2.2084	0.00162623
			Soltu.DM.09G027130	5.46	0.0399559
			Soltu.DM.09G027140	3.86381	1.71606e-08
			Soltu.DM.09G027510	8.27339	1.54708e-08
			Soltu.DM.09G028080	9.21422	2.88213e-06
			Soltu.DM.09G028330	1.48215	0.0126061
			Soltu.DM.09G029260	1.96265	0.000856227
			Soltu.DM.09G030320	3.04241	4.19313e-09
			Soltu.DM.09G030520	5.83291	0.00510031
			Soltu.DM.09G031020	7.22547	5.64328e-06
			Soltu.DM.10G000030	5.68189	0.0128375
			Soltu.DM.10G003360	1.34166	0.0159786
			Soltu.DM.10G003700	5.0272	5.53477e-11
			Soltu.DM.10G003750	1.9795	0.0288912
			Soltu.DM.10G003780	8.09049	7.82569e-10
			Soltu.DM.10G004100	2.63817	0.00218249
			Soltu.DM.10G004610	2.82105	0.00229995
			Soltu.DM.10G005420	3.24322	7.13211e-07
			Soltu.DM.10G005430	5.65503	0.0123912
			Soltu.DM.10G005870	3.26443	4.70823e-08
			Soltu.DM.10G006790	1.22987	0.00544848
			Soltu.DM.10G007870	6.5044	6.25887e-06
			Soltu.DM.10G008210	5.46784	0.0471036
			Soltu.DM.10G008880	1.69805	0.000250218
			Soltu.DM.10G010630	2.43608	7.53141e-08
			Soltu.DM.10G010830	4.35646	0.00416394
			Soltu.DM.10G013710	2.97091	0.00877191
			Soltu.DM.10G013950	1.52625	0.0352976
			Soltu.DM.10G014020	2.96229	0.00610434
			Soltu.DM.10G014580	2.72869	0.000910801
			Soltu.DM.10G015000	2.70414	1.40988e-41
			Soltu.DM.10G015280	4.53305	6.60739e-08
			Soltu.DM.10G015290	2.1461	0.0279327
			Soltu.DM.10G015440	2.82834	0.011801
			Soltu.DM.10G015450	7.29183	3.49917e-07
			Soltu.DM.10G016830	1.43587	1.28589e-06
			Soltu.DM.10G017080	2.64753	2.95969e-10
			Soltu.DM.10G018700	5.59747	0.000353302
			Soltu.DM.10G018710	6.06214	7.47502e-05
			Soltu.DM.10G019000	8.65379	1.04854e-09
			Soltu.DM.10G019160	4.80221	3.06957e-31
			Soltu.DM.10G019170	5.60634	1.29861e-21
			Soltu.DM.10G020180	5.60182	0.000240327
			Soltu.DM.10G020610	1.33604	1.73119e-06
			Soltu.DM.10G021090	2.06579	0.000805907
			Soltu.DM.10G021190	2.22665	0.01947
			Soltu.DM.10G021270	1.51412	0.00343006
			Soltu.DM.10G021460	1.97621	0.00386334
			Soltu.DM.10G021790	2.96851	0.0239446
			Soltu.DM.10G022640	7.77628	5.9483e-08
			Soltu.DM.10G022670	1.50468	0.031897
			Soltu.DM.10G023660	2.0102	3.95397e-14
			Soltu.DM.10G024360	6.02019	6.19174e-05
			Soltu.DM.10G024900	2.50913	2.75134e-11
			Soltu.DM.10G025310	3.34515	0.00368212
			Soltu.DM.10G025360	3.24171	1.71331e-07
			Soltu.DM.10G025380	1.25541	0.00150344
			Soltu.DM.10G025650	3.53614	0.00117315
			Soltu.DM.10G027050	6.53645	0.00283337
			Soltu.DM.10G027140	1.36359	3.28371e-07
			Soltu.DM.10G027280	8.66041	4.04623e-11
			Soltu.DM.10G027290	4.7314	0.0372587
			Soltu.DM.10G029150	1.865	0.0116349
			Soltu.DM.10G029720	1.275	0.00124052
			Soltu.DM.10G029930	6.46833	0.0016122
			Soltu.DM.10G030160	4.9209	0.0285989
			Soltu.DM.11G000380	7.03421	2.10302e-06
			Soltu.DM.11G001360	1.87372	0.00619693
			Soltu.DM.11G002420	1.7409	2.98911e-05
			Soltu.DM.11G002910	4.47916	0.0221662
			Soltu.DM.11G003000	1.36649	2.65939e-07
			Soltu.DM.11G003430	1.82733	1.94923e-07
			Soltu.DM.11G004040	5.64172	3.93938e-06
			Soltu.DM.11G004220	3.39215	1.67049e-06
			Soltu.DM.11G004860	1.92919	9.93013e-06
			Soltu.DM.11G005440	2.00065	3.20446e-05
			Soltu.DM.11G005490	1.78558	0.0310618
			Soltu.DM.11G006130	2.11462	6.55183e-07
			Soltu.DM.11G006640	2.56885	0.0376503
			Soltu.DM.11G006990	1.37425	0.0283394
			Soltu.DM.11G008020	1.21287	7.78865e-07
			Soltu.DM.11G008040	1.87429	1.19076e-10
			Soltu.DM.11G008250	2.81423	5.34103e-17
			Soltu.DM.11G009090	1.4262	0.00046445
			Soltu.DM.11G009530	2.98237	0.000533857
			Soltu.DM.11G010730	1.44749	4.89954e-05
			Soltu.DM.11G010780	1.86671	1.63434e-05
			Soltu.DM.11G011130	2.90738	8.88536e-07
			Soltu.DM.11G011310	2.46338	0.0386762
			Soltu.DM.11G011390	2.03473	7.04401e-08
			Soltu.DM.11G012620	1.91891	9.20491e-10
			Soltu.DM.11G012950	2.94552	0.0316159
			Soltu.DM.11G013020	2.29273	1.41741e-05
			Soltu.DM.11G015280	1.27624	0.0146103
			Soltu.DM.11G015510	2.35144	0.000116226
			Soltu.DM.11G016770	2.57329	0.0177174
			Soltu.DM.11G016780	3.66712	0.00092723
			Soltu.DM.11G018030	1.39553	2.28533e-11
			Soltu.DM.11G018040	1.44826	0.00421362
			Soltu.DM.11G018140	5.71841	0.0028424
			Soltu.DM.11G019040	5.81338	8.71032e-05
			Soltu.DM.11G019060	1.70906	0.0156156
			Soltu.DM.11G019350	1.68604	5.50783e-15
			Soltu.DM.11G020020	2.30583	0.000268837
			Soltu.DM.11G020340	2.9161	7.97026e-08
			Soltu.DM.11G021630	1.70145	5.06165e-13
			Soltu.DM.11G022470	2.09181	0.0134413
			Soltu.DM.11G022580	1.21355	0.00136664
			Soltu.DM.11G024330	2.85256	0.037038
			Soltu.DM.11G025860	5.39172	0.0140795
			Soltu.DM.11G025870	1.22905	0.0397807
			Soltu.DM.11G026460	1.63347	1.23151e-06
			Soltu.DM.12G000320	1.71569	0.0207852
			Soltu.DM.12G001310	2.84683	1.74538e-23
			Soltu.DM.12G002070	2.49778	6.53068e-09
			Soltu.DM.12G002220	1.74362	1.43027e-06
			Soltu.DM.12G002380	2.28675	2.56725e-14
			Soltu.DM.12G002730	1.40959	0.0436665
			Soltu.DM.12G003080	3.08974	0.000701163
			Soltu.DM.12G003330	5.45337	0.0184503
			Soltu.DM.12G003400	1.90093	2.90882e-05
			Soltu.DM.12G003410	5.7693	0.00907556
			Soltu.DM.12G003420	3.66509	2.58795e-06
			Soltu.DM.12G003460	2.1818	1.92413e-05
			Soltu.DM.12G003640	2.81824	0.0208367
			Soltu.DM.12G004780	1.6842	1.0316e-20
			Soltu.DM.12G004850	2.02623	0.000186307
			Soltu.DM.12G005050	2.45901	3.46006e-14
			Soltu.DM.12G005210	2.22221	0.015073
			Soltu.DM.12G005260	2.92762	0.000288869
			Soltu.DM.12G005760	2.75887	0.0190404
			Soltu.DM.12G006160	5.65315	0.000859241
			Soltu.DM.12G006790	3.34019	0.00922769
			Soltu.DM.12G007440	4.01986	0.00169875
			Soltu.DM.12G007460	1.95557	5.85887e-05
			Soltu.DM.12G007800	1.58041	0.035299
			Soltu.DM.12G008250	4.61481	0.0417377
			Soltu.DM.12G008410	5.77431	0.0034441
			Soltu.DM.12G008630	1.50327	5.69307e-07
			Soltu.DM.12G009250	6.55826	0.00169226
			Soltu.DM.12G010520	2.41522	1.7704e-05
			Soltu.DM.12G010790	3.97951	2.83824e-09
			Soltu.DM.12G010960	1.56445	0.0218573
			Soltu.DM.12G011100	4.63002	2.24317e-05
			Soltu.DM.12G011170	3.78062	4.2204e-17
			Soltu.DM.12G011230	1.80841	0.0183956
			Soltu.DM.12G011310	1.64698	5.19175e-06
			Soltu.DM.12G012180	1.42219	3.19049e-06
			Soltu.DM.12G014070	1.94824	0.000480607
			Soltu.DM.12G014570	1.91745	0.0110478
			Soltu.DM.12G015130	2.55445	1.69643e-05
			Soltu.DM.12G016160	2.76947	5.95044e-08
			Soltu.DM.12G021510	1.53163	0.00582942
			Soltu.DM.12G021590	1.60568	6.06729e-05
			Soltu.DM.12G021660	1.69432	5.50833e-05
			Soltu.DM.12G022240	4.89739	0.000514782
			Soltu.DM.12G023040	6.34407	0.000260782
			Soltu.DM.12G023050	2.1691	0.0091306
			Soltu.DM.12G024010	3.04597	0.00962966
			Soltu.DM.12G025130	6.14453	0.0127341
			Soltu.DM.12G026290	2.36014	0.0329933
			Soltu.DM.12G029020	2.96216	0.00413836
			Soltu.DM.12G029050	1.3734	1.26057e-08
			Soltu.DM.12G029360	1.62864	0.0429846
			Soltu.DM.12G029690	3.61484	3.09715e-05
			Soltu.DM.12G029770	1.58556	0.00128923
			Soltu.DM.12G029820	2.06389	9.58492e-24
			Soltu.DM.S000190	1.5435	7.4433e-05

## Sheet: Table S3
Table S3. S. tuberosum genes that are downregulated at 2 and 3 days post inoculation (dpi).
Downregulated Genes at 2 dpi			Downregulated Genes at 3dpi			Common Genes
Gene ID	log2 Fold Change	adjusted p value	Gene ID	log2 Fold Change	adjusted p value	Gene ID	Putative Functions
Soltu.DM.01G006230	-5.27865	0.0044803	Soltu.DM.01G000110	-2.99187	0.0282416	Soltu.DM.01G006340	FAF-like chloroplastic protein
Soltu.DM.01G006340	-1.39323	0.000178024	Soltu.DM.01G000240	-1.6464	0.0242995	Soltu.DM.03G014050	Myb domain TF
Soltu.DM.01G012100	-3.82054	0.0331095	Soltu.DM.01G000660	-1.22334	0.00088735	Soltu.DM.03G025330	Cytochrome P450 family protein
Soltu.DM.01G025240	-1.38051	0.0108073	Soltu.DM.01G000730	-5.75028	0.00319605	Soltu.DM.07G017910	Homeodomain-like TF
Soltu.DM.02G012840	-4.05292	0.00329166	Soltu.DM.01G002270	-2.44403	0.00439599	Soltu.DM.08G006170	Endonuclease family protein
Soltu.DM.03G011570	-2.84707	0.00159716	Soltu.DM.01G002750	-2.31317	0.00630408	Soltu.DM.09G004610	Exostosin family protein
Soltu.DM.03G012600	-6.62404	0.00276081	Soltu.DM.01G002760	-2.85011	6.01846e-05	Soltu.DM.12G020320	RNA helicase family protein
Soltu.DM.03G014050	-1.8671	0.0287945	Soltu.DM.01G002770	-2.705	8.59608e-12
Soltu.DM.03G025330	-2.11155	0.0469663	Soltu.DM.01G002790	-2.38283	0.0141265
Soltu.DM.03G027130	-5.35575	0.00758992	Soltu.DM.01G003100	-5.6218	0.00331713
Soltu.DM.04G010350	-1.25964	6.11e-05	Soltu.DM.01G003290	-2.23558	1.89364e-05
Soltu.DM.04G026910	-2.64074	0.0129346	Soltu.DM.01G003400	-1.37942	0.00268003
Soltu.DM.04G028950	-1.36499	0.0384711	Soltu.DM.01G006340	-1.60727	4.9321e-06
Soltu.DM.05G021910	-4.65647	3.05e-06	Soltu.DM.01G006410	-2.84493	0.042168
Soltu.DM.06G016040	-1.2421	0.0306915	Soltu.DM.01G008580	-1.47835	0.0164638
Soltu.DM.06G030620	-1.27994	0.0168387	Soltu.DM.01G009180	-7.05143	5.77749e-06
Soltu.DM.06G030800	-3.25308	0.00146984	Soltu.DM.01G012750	-1.20403	0.000503359
Soltu.DM.07G001090	-2.04879	0.00329396	Soltu.DM.01G014550	-2.39301	0.0255566
Soltu.DM.07G002840	-5.52802	0.0138604	Soltu.DM.01G016050	-1.51823	0.000117587
Soltu.DM.07G005420	-2.11135	0.00467966	Soltu.DM.01G017870	-5.28809	0.000240531
Soltu.DM.07G014910	-1.45748	0.0014008	Soltu.DM.01G019830	-2.20943	0.0434411
Soltu.DM.07G016210	-4.99541	0.00663001	Soltu.DM.01G021090	-6.08277	0.00341739
Soltu.DM.07G017910	-5.80997	0.0271261	Soltu.DM.01G021600	-1.30232	1.45569e-09
Soltu.DM.07G019950	-6.35365	0.000940144	Soltu.DM.01G022860	-7.19651	6.48946e-05
Soltu.DM.08G004640	-4.98876	0.0157383	Soltu.DM.01G027520	-4.65246	0.0254644
Soltu.DM.08G006170	-1.67351	1.72e-08	Soltu.DM.01G029010	-6.8094	0.000466924
Soltu.DM.08G021340	-2.00353	0.0174661	Soltu.DM.01G029440	-1.46794	7.0708e-05
Soltu.DM.09G003410	-5.48362	0.00267372	Soltu.DM.01G029640	-2.52406	0.000742679
Soltu.DM.09G004610	-3.07783	1.74e-05	Soltu.DM.01G030260	-3.41633	0.0441612
Soltu.DM.09G007900	-4.69461	0.00919421	Soltu.DM.01G031450	-2.23243	0.00524504
Soltu.DM.09G009700	-4.98645	0.00386422	Soltu.DM.01G031540	-9.04879	0.0109839
Soltu.DM.09G029340	-5.05679	0.0496428	Soltu.DM.01G033300	-2.70047	0.00394494
Soltu.DM.10G002800	-4.81039	0.0284028	Soltu.DM.01G036260	-1.26751	5.06133e-07
Soltu.DM.11G009690	-2.53216	0.00329166	Soltu.DM.01G039840	-2.99682	0.0041796
Soltu.DM.11G017070	-2.2088	0.00162933	Soltu.DM.01G044870	-1.31494	0.0310505
Soltu.DM.12G004090	-1.81232	0.0182576	Soltu.DM.01G047210	-2.75716	0.00184691
Soltu.DM.12G020320	-2.57527	0.010488	Soltu.DM.01G048780	-8.25505	6.83796e-08
Soltu.DM.12G027300	-5.70242	0.0230479	Soltu.DM.01G050160	-4.38241	7.89073e-07
			Soltu.DM.02G000780	-1.48918	0.000437911
			Soltu.DM.02G004770	-2.01863	0.00428156
			Soltu.DM.02G006960	-1.80531	1.10798e-07
			Soltu.DM.02G008290	-1.23877	0.00149357
			Soltu.DM.02G011190	-1.61987	0.00158432
			Soltu.DM.02G011530	-1.52077	0.00839865
			Soltu.DM.02G015200	-5.3998	0.0073982
			Soltu.DM.02G015210	-7.53718	1.37326e-07
			Soltu.DM.02G016940	-2.54166	2.17832e-12
			Soltu.DM.02G017570	-1.40574	0.00703777
			Soltu.DM.02G018030	-3.89579	0.004754
			Soltu.DM.02G019460	-4.36687	0.00365853
			Soltu.DM.02G019740	-3.42439	0.02863
			Soltu.DM.02G026270	-1.39745	0.00774542
			Soltu.DM.02G026370	-5.94951	0.0170592
			Soltu.DM.02G030130	-5.23678	0.0489202
			Soltu.DM.02G033320	-2.52578	0.00181824
			Soltu.DM.02G033500	-1.87557	0.026223
			Soltu.DM.03G000720	-5.53545	0.00148553
			Soltu.DM.03G004180	-2.13978	0.00106836
			Soltu.DM.03G005800	-5.09669	0.044494
			Soltu.DM.03G006460	-2.58847	6.32642e-14
			Soltu.DM.03G009160	-4.33619	0.0157661
			Soltu.DM.03G009170	-1.67451	2.02404e-08
			Soltu.DM.03G014050	-1.3438	0.0499583
			Soltu.DM.03G014330	-4.36597	0.0400787
			Soltu.DM.03G015560	-3.0186	0.0234976
			Soltu.DM.03G015890	-5.52542	0.0376043
			Soltu.DM.03G019070	-7.43687	2.50851e-07
			Soltu.DM.03G019080	-2.05903	9.21897e-09
			Soltu.DM.03G019110	-4.63777	0.00773875
			Soltu.DM.03G021730	-3.20494	4.75075e-16
			Soltu.DM.03G023650	-4.60077	0.00244354
			Soltu.DM.03G023920	-1.75979	0.0199126
			Soltu.DM.03G024780	-4.10588	1.58196e-05
			Soltu.DM.03G025330	-4.67122	7.20361e-09
			Soltu.DM.03G025770	-5.7426	0.0247292
			Soltu.DM.03G026910	-1.79691	0.0390624
			Soltu.DM.03G028010	-2.382	0.000117705
			Soltu.DM.03G033690	-2.04566	0.000233759
			Soltu.DM.03G034300	-2.57123	0.00148093
			Soltu.DM.03G034930	-4.08202	0.00122463
			Soltu.DM.03G036990	-5.63498	0.0354482
			Soltu.DM.04G000880	-5.94571	0.0151245
			Soltu.DM.04G001920	-2.47946	0.0122623
			Soltu.DM.04G002320	-2.78763	0.034134
			Soltu.DM.04G002510	-6.47578	0.00274613
			Soltu.DM.04G004500	-1.94301	0.030948
			Soltu.DM.04G004510	-1.20577	0.0146522
			Soltu.DM.04G009170	-1.62894	0.0442036
			Soltu.DM.04G009940	-1.54661	0.0203122
			Soltu.DM.04G010940	-3.82785	0.00250463
			Soltu.DM.04G012190	-2.02046	0.0060918
			Soltu.DM.04G012440	-2.07947	3.70988e-05
			Soltu.DM.04G015970	-5.37203	0.0221662
			Soltu.DM.04G024320	-4.17643	4.59424e-08
			Soltu.DM.04G027460	-6.95216	0.000321865
			Soltu.DM.04G027640	-2.51057	5.41073e-06
			Soltu.DM.04G027680	-1.9549	0.00172522
			Soltu.DM.04G028130	-1.82728	0.0288363
			Soltu.DM.04G037950	-2.09156	0.00202201
			Soltu.DM.05G000220	-8.50086	1.6126e-09
			Soltu.DM.05G001050	-3.76898	0.00317405
			Soltu.DM.05G001960	-3.70655	0.00759922
			Soltu.DM.05G002830	-5.2106	0.0127885
			Soltu.DM.05G003290	-2.18015	7.68855e-06
			Soltu.DM.05G003690	-6.82008	0.00128117
			Soltu.DM.05G004270	-1.65243	0.00436918
			Soltu.DM.05G005150	-3.31552	0.000576628
			Soltu.DM.05G006160	-4.61294	0.0330853
			Soltu.DM.05G018730	-2.5629	0.0372369
			Soltu.DM.05G018810	-2.38092	8.17153e-07
			Soltu.DM.06G000600	-3.92088	0.0251432
			Soltu.DM.06G000660	-4.63843	0.00223451
			Soltu.DM.06G001150	-7.36172	1.35296e-05
			Soltu.DM.06G002820	-6.53024	0.000505452
			Soltu.DM.06G003720	-3.95809	0.00183579
			Soltu.DM.06G004000	-1.66258	3.11393e-05
			Soltu.DM.06G004020	-3.63047	0.0468743
			Soltu.DM.06G012350	-2.35673	0.0488968
			Soltu.DM.06G013590	-1.62726	0.00975866
			Soltu.DM.06G013650	-1.96693	0.0137772
			Soltu.DM.06G016050	-4.40541	0.0464628
			Soltu.DM.06G017590	-1.48634	0.0100732
			Soltu.DM.06G017650	-7.3328	1.61733e-05
			Soltu.DM.06G018060	-1.48247	0.00185517
			Soltu.DM.06G018170	-3.60372	0.000216535
			Soltu.DM.06G020650	-5.31442	0.019629
			Soltu.DM.06G022870	-1.58253	2.11673e-07
			Soltu.DM.06G023410	-2.62089	0.000774806
			Soltu.DM.06G024340	-1.76799	0.00153499
			Soltu.DM.06G024620	-2.19603	0.0412713
			Soltu.DM.06G025310	-6.90595	7.58944e-05
			Soltu.DM.06G025580	-1.40788	0.00484501
			Soltu.DM.06G026770	-5.80793	0.00753601
			Soltu.DM.06G029540	-2.79402	3.73937e-12
			Soltu.DM.06G030590	-1.37334	0.00418584
			Soltu.DM.06G031580	-1.45437	2.36225e-08
			Soltu.DM.06G031850	-1.75839	0.0215903
			Soltu.DM.06G033930	-3.45004	2.22104e-06
			Soltu.DM.07G001420	-1.83399	0.00744116
			Soltu.DM.07G006590	-1.49357	0.0459302
			Soltu.DM.07G008670	-1.96569	0.00573948
			Soltu.DM.07G011740	-3.59806	0.0121498
			Soltu.DM.07G013340	-2.96776	4.08918e-05
			Soltu.DM.07G013360	-1.48631	0.00114647
			Soltu.DM.07G013870	-2.80241	3.64696e-05
			Soltu.DM.07G016160	-1.44861	0.00121436
			Soltu.DM.07G017910	-5.34831	0.0119641
			Soltu.DM.07G018560	-5.6172	0.0334977
			Soltu.DM.07G018570	-1.24912	4.29693e-07
			Soltu.DM.07G018780	-2.86096	0.0216937
			Soltu.DM.07G018800	-6.6028	0.002003
			Soltu.DM.07G022010	-1.62568	0.0169605
			Soltu.DM.07G022920	-4.33784	0.0109696
			Soltu.DM.07G024370	-3.913	0.000255664
			Soltu.DM.07G026770	-2.69477	0.000365132
			Soltu.DM.07G027990	-2.23565	0.000380346
			Soltu.DM.08G003190	-5.07235	0.0453076
			Soltu.DM.08G004850	-5.66831	0.0123043
			Soltu.DM.08G004980	-1.34871	4.62855e-06
			Soltu.DM.08G005120	-5.10764	7.13477e-16
			Soltu.DM.08G005410	-6.1607	0.00608409
			Soltu.DM.08G006030	-3.99749	0.00371265
			Soltu.DM.08G006170	-2.40257	9.97338e-17
			Soltu.DM.08G006990	-2.20715	7.30214e-07
			Soltu.DM.08G011070	-7.014	0.000155149
			Soltu.DM.08G012500	-2.62807	0.0427235
			Soltu.DM.08G015910	-1.83488	0.0134749
			Soltu.DM.08G016130	-2.42066	0.0346289
			Soltu.DM.08G017290	-2.62255	7.08715e-12
			Soltu.DM.08G017380	-2.69629	1.14958e-06
			Soltu.DM.08G017870	-2.98735	0.00744039
			Soltu.DM.08G017880	-1.82365	0.00101256
			Soltu.DM.08G017910	-1.44245	0.00451327
			Soltu.DM.08G017930	-1.27093	0.00897734
			Soltu.DM.08G017950	-1.27223	0.00341699
			Soltu.DM.08G017960	-1.63975	0.000449798
			Soltu.DM.08G018590	-4.39123	0.0162692
			Soltu.DM.08G022420	-5.62797	0.00144793
			Soltu.DM.08G026670	-1.44377	0.0409334
			Soltu.DM.08G026940	-1.81126	0.00598293
			Soltu.DM.08G028250	-3.897	0.00126145
			Soltu.DM.09G001440	-3.17805	0.000556159
			Soltu.DM.09G003280	-2.0754	9.93671e-09
			Soltu.DM.09G003510	-2.65458	0.00119207
			Soltu.DM.09G004610	-1.23772	0.0338721
			Soltu.DM.09G006000	-1.2096	0.0484809
			Soltu.DM.09G006400	-4.71208	0.0382582
			Soltu.DM.09G006440	-1.24615	7.05918e-11
			Soltu.DM.09G007070	-3.07247	6.87174e-06
			Soltu.DM.09G007950	-2.93544	5.00625e-16
			Soltu.DM.09G008540	-4.04594	0.000904441
			Soltu.DM.09G009450	-2.40241	0.0285033
			Soltu.DM.09G009470	-1.24543	0.0398665
			Soltu.DM.09G016880	-5.94137	6.06049e-12
			Soltu.DM.09G018290	-2.28086	2.13773e-06
			Soltu.DM.09G021380	-1.72572	0.0333451
			Soltu.DM.09G021600	-2.83352	0.000145107
			Soltu.DM.09G022070	-4.20428	0.0147144
			Soltu.DM.09G026120	-1.24498	2.21061e-07
			Soltu.DM.09G026500	-3.33223	9.73876e-05
			Soltu.DM.09G029360	-2.06976	0.0113792
			Soltu.DM.09G031400	-2.85746	0.0174166
			Soltu.DM.10G000420	-6.13043	0.00998361
			Soltu.DM.10G000430	-3.61059	0.000351481
			Soltu.DM.10G000520	-4.07166	3.72727e-13
			Soltu.DM.10G004820	-3.25322	0.000498236
			Soltu.DM.10G005050	-3.16671	0.00329969
			Soltu.DM.10G005160	-1.36026	0.00581505
			Soltu.DM.10G006710	-3.8162	0.00939017
			Soltu.DM.10G006990	-5.97386	0.00590326
			Soltu.DM.10G015890	-1.66955	0.0123788
			Soltu.DM.10G018300	-1.48066	0.0459292
			Soltu.DM.10G019470	-1.6804	0.040083
			Soltu.DM.10G019610	-5.79225	0.0140475
			Soltu.DM.10G019630	-2.09061	0.000310628
			Soltu.DM.10G022000	-3.33494	2.81968e-10
			Soltu.DM.10G022800	-5.68766	0.000885454
			Soltu.DM.10G026380	-6.53788	0.00186124
			Soltu.DM.10G026790	-1.99611	0.0010723
			Soltu.DM.10G027720	-3.94226	0.0175533
			Soltu.DM.10G028040	-4.42909	1.74237e-06
			Soltu.DM.10G029610	-2.44712	4.54511e-06
			Soltu.DM.11G000830	-5.34628	0.019327
			Soltu.DM.11G003610	-2.61715	0.00448902
			Soltu.DM.11G004710	-7.49513	2.64802e-06
			Soltu.DM.11G004720	-7.63342	4.64384e-05
			Soltu.DM.11G007680	-1.89577	0.0118027
			Soltu.DM.11G008120	-6.853	0.000244509
			Soltu.DM.11G008170	-3.64559	1.99434e-13
			Soltu.DM.11G009960	-1.28197	1.54557e-06
			Soltu.DM.11G009970	-1.34909	9.40339e-07
			Soltu.DM.11G016990	-2.01283	0.00965022
			Soltu.DM.11G019830	-5.85508	0.0248638
			Soltu.DM.11G019840	-7.50075	5.57366e-06
			Soltu.DM.11G023240	-3.45929	0.00025232
			Soltu.DM.11G024640	-1.92868	1.84401e-08
			Soltu.DM.12G000500	-1.4892	0.000209214
			Soltu.DM.12G000980	-3.03048	7.19911e-07
			Soltu.DM.12G003370	-6.90113	0.000295365
			Soltu.DM.12G003380	-2.67155	0.00040999
			Soltu.DM.12G004880	-5.50564	0.031134
			Soltu.DM.12G005190	-5.81914	0.00216659
			Soltu.DM.12G005750	-1.77921	0.0168271
			Soltu.DM.12G007220	-7.6142	8.10592e-08
			Soltu.DM.12G010390	-6.09533	0.00104701
			Soltu.DM.12G011220	-2.90735	0.0354207
			Soltu.DM.12G014160	-1.82892	4.39393e-10
			Soltu.DM.12G019660	-5.8736	0.00693366
			Soltu.DM.12G019890	-5.09937	0.0421928
			Soltu.DM.12G019910	-7.11201	0.000241373
			Soltu.DM.12G020320	-1.90932	0.0108654
			Soltu.DM.12G020960	-2.99409	0.000897874
			Soltu.DM.12G021720	-2.90872	0.0136031
			Soltu.DM.12G022680	-5.08061	0.000466268
			Soltu.DM.12G022930	-3.03177	1.33783e-10
			Soltu.DM.12G023420	-3.06819	2.36735e-14
			Soltu.DM.12G023620	-7.55738	1.01767e-05
			Soltu.DM.12G024540	-5.0346	0.0478348
			Soltu.DM.12G024650	-7.85085	5.57417e-09
			Soltu.DM.12G024680	-1.74731	0.0316159
			Soltu.DM.12G026210	-1.69977	0.000970029
			Soltu.DM.12G028530	-2.46632	0.00240162
			Soltu.DM.S001510	-1.91391	0.0311722
			Soltu.DM.S002210	-2.187	0.0269621
			Soltu.DM.S002600	-2.02018	0.0142155

## Sheet: Table S4
Table S4. Upregulated transcription factors at 2 or 3 dpi.
Family	Locus ID	S.tuberosum Gene name	Putative Function(Spud DB)	Arabidopsis Ortholog	Arabidopsis Gene Name	Arabidiopsis Gene Description	Reference
AP2/EREB	Soltu.DM.08G022150.1		Integrase-type DNA binding protein	AT3G54320.3	WRI1 (Wrinkled 1)	AP2 family protein	TAIR
AP2/ERF	Soltu.DM.02G027330.1		Integrase-type DNA binding protein	AT4G37750.1		AINTEGUMENTA-like
	Soltu.DM.04G005980.1		AINTEGUMENTA-like	AT1G68550.1
	Soltu.DM.05G021130.1		AINTEGUMENTA-like	AT5G10510.2		AINTEGUMENTA-like 6
	Soltu.DM.08G028390.1			AT1G68550.1
	Soltu.DM.11G002910.1		AINTEGUMENTA-like	AT5G10510.2		AINTEGUMENTA-like 6
	Soltu.DM.07G007140.1		AINTEGUMENTA-like	AT5G57390.1		AINTEGUMENTA-like 5
	Soltu.DM.01G047760.1		ERF109-like	AT4G34410.1	ERF109	Redox responsive transcription factor 1
	Soltu.DM.02G028930.1		Redox responsive TF	AT2G33710.1
	Soltu.DM.03G001930.1		Ethylene responsive TF	AT3G15210.1	ERF4	Ethylene responsive factor/negative regulator of JA response to F. oxysporum
	Soltu.DM.03G016740.1		DREB1A	AT5G51990.1	CBF4, DREB1D	C-repeat-binding factor 4 (drought tolerance factor)
	Soltu.DM.03G016750.1		DREB1A	AT4G25470.1	ATCBF2 /DREB1C	C-repeat/DRE binding factor 2/ Freezing tolerance QTL
	Soltu.DM.03G031550.1		Ethylene responsive TF	AT3G23240.1	ERF1	Ethylene response factor 1
	Soltu.DM.03G034330.1		Integrase-type DNA binding protein	AT5G19790.1	RAP2.11	Related to AP2 11
	Soltu.DM.05G020210.1		Integrase-type DNA binding protein	AT1G01250.1		DREB subfamily
	Soltu.DM.06G015880.1		Integrase-type DNA binding protein	AT1G19210.1	ERF17	DREB subfamily
	Soltu.DM.07G012990.1		Integrase-type DNA binding protein	AT1G19210.1	ERF17	DREB subfamily
	Soltu.DM.08G024160.1		Ethylene responsive TF	AT5G47220.1	ERF2	Ethylene responsive element binding factor 2
	Soltu.DM.08G024640.1		Integrase-type DNA binding protein	AT2G44940.1	ERF34
	Soltu.DM.10G015440.1		Redox responsive TF	AT4G34410.1	ERF109	Ethylene response/redox responsive TF 1
	Soltu.DM.10G015450.1		Redox responsive TF	AT4G34410.1	ERF109	Ethylene response/redox responsive TF 1
	Soltu.DM.11G011130.1		Integrase-type DNA binding protein	AT1G21910.1	DREB26	DREB subfamily
	Soltu.DM.12G026290.1		Integrase-type DNA binding protein	AT1G19210.1	ERF17	DREB subfamily
	Soltu.DM.01G047760.1		Redox responsive TF	AT4G34410.1	ERF109	Ethylene response/redox responsive TF 1
	Soltu.DM.02G028930.1		Redox responsive TF	AT2G33710.1
	Soltu.DM.03G001930.1		Ethylene responsive TF	AT3G15210.1	ERF4	Ethylene responsive/negative regulator of JA response to F. oxysporum
	Soltu.DM.07G012990.1		Integrase-type DNA binding protein	AT1G19210.1	ERF17	DREB subfamily
	Soltu.DM.08G000070.1		DREB1A	AT5G51990.1	CBF4, DREB1D	C-repeat-binding factor 4 (drought tolerance factor)
	Soltu.DM.08G024160.1		Ethylene responsive TF	AT5G47220.1	ERF2	Ethylene responsive element binding factor 2
	Soltu.DM.09G026500.1			AT3G23230.1	ERF98	Ethylene response factor 1
	Soltu.DM.10G015440.1		Redox responsive TF	AT4G34410.1	ERF109	Ethylene response/redox responsive TF 1
	Soltu.DM.12G011520.1		Integrase-type DNA binding protein	AT5G61890.1	ERF114	Ethylene response/redox responsive TF 114
AP2/RAV	Soltu.DM.04G001380.1			AT1G13260.1	RAV1/EDF4	related to ABI3/VP1 1	TAIR
	Soltu.DM.04G001380.1			AT1G13260.1	RAV1/EDF4	related to ABI3/VP1 1
B3	Soltu.DM.12G025190.1			AT4G03170.1
	Soltu.DM.02G029650.1			AT4G33280.1
	Soltu.DM.02G034530.1			AT3G26790.1	FUS3
	Soltu.DM.11G018030.1			AT2G24700.1
bHLH	Soltu.DM.01G046530.1			AT2G14760.1
	Soltu.DM.02G028560.1			AT4G36930.1	SPT (Spatula)
	Soltu.DM.04G002320.1		Phytochrome interacting factor	AT1G09530.2		Phytochrome interacting factor 3
	Soltu.DM.08G005120.1			AT4G17880.1	MYC4
	Soltu.DM.01G022230.1			AT1G49770.1	RGE1, ZHOUPI, ZOU	Causes shriveled seeds & small embryos
	Soltu.DM.03G022880.1			AT5G53210.1
	Soltu.DM.04G032760.1			AT2G14760.1
	Soltu.DM.04G033540.1			AT3G50330.1	HEC2 (Hecate 2)
	Soltu.DM.05G008840.2			AT2G16910.1	AMS (Aborted microspores)
	Soltu.DM.06G025680.1		Phytochrome interacting factor 7	AT4G00050.1	PIF8, UNE10	Phytochrome interacting factor 8
	Soltu.DM.10G004100.1			AT4G20970.1
	Soltu.DM.10G029720.1			AT2G41130.1	BHLH106, STC8	Salt tolerant callus 8
	Soltu.DM.12G002380.1			AT3G07340.1
bZIP	Soltu.DM.02G030370.1	StbZIP42		AT3G30530.1	bZIP42	Basic leucine-zipper 42	Herath and Verchot 2020; TAIR
	Soltu.DM.05G001710.1	StbZIP58		AT3G30530.1	bZIP42	Basic leucine-zipper 42
	Soltu.DM.05G002740.1	StbZIP46		AT1G68640.1	bZIP46, PAN,TGA8	bZIP family protein
	Soltu.DM.07G020410.1	StbZIP61		AT3G58120.1	bZIP34	bZIP family protein
	Soltu.DM.10G015000.1	StbZIP37		AT4G34000.1	bZIP66/AREB3	AREB3 (ABA-responsive binding 3)
C2H2	Soltu.DM.02G031060.1		Zinc finger protein	AT1G26610.1		Zinc finger protein	TAIR
	Soltu.DM.05G026190.1		ZAT5-like	AT5G04390.1		Zinc finger protein
	Soltu.DM.11G026530.1	ZPT2-13	ZAT11-like	AT2G37430.1	ZAT11	Zinc finger protein
	Soltu.DM.01G031470.1		Zinc finger protein	AT3G60580.1	ZAT9	Zinc finger protein
	Soltu.DM.06G018550.1		Superman	AT4G17810.1	EMB3022	Root hair development
	Soltu.DM.08G022840.1		Zinc finger protein	AT4G17810.1	EMB3022	Root hair development
	Soltu.DM.09G020360.1		Zinc finger protein	AT1G03840.1	IDD3	Indeterminate domain 3
	Soltu.DM.01G050010.1		B-box Zinc finger protein	AT4G39070.1	BBX20, BZS1, STH7	Brassinosteroid-regulated BZR1 target
Dof	Soltu.DM.10G005360.2			AT3G61850.4		Zinc finger protein	TAIR
	Soltu.DM.01G035240.1			AT3G61850.4		Zinc finger protein
	Soltu.DM.02G016040.1			AT1G29160.1	COG1	Regulates PRX2 and PRX25, seed coat development
	Soltu.DM.06G026620.1			AT5G62940.1	DOF5.6, HCA2	Cambium tissue formation, vascular development
	Soltu.DM.10G020610.1			AT2G37590.1	DOF2.4, PEAR1	DNA binding with one finger 2.4
EIL	Soltu.DM.03G012570.1		Ethylene Insensitive 3 family protein	AT5G65100.1	EIL-3	EIL family protein
G2-like	Soltu.DM.03G001760.1			AT2G42660.1		Homeobox protein 22
GeBP	Soltu.DM.02G000210.1		Storekeeper protein-related TF	AT1G11510.1		Storekeeper protein-related TF
GRAS	Soltu.DM.06G031600.1			AT2G37650.1	EAL1, SGR7, SHR	Endodermal-amyloplast less 1, shoot gravistropism 7, short root	TAIR
	Soltu.DM.08G005510.1			AT2G37650.1	EAL1, SGR7, SHR
GRF	Soltu.DM.02G027350.1			AT2G22840.1	GRF1	Growth-regulating factor 1
	Soltu.DM.03G021710.1			AT5G53660.1	GRF7	Growth-regulating factor 7
	Soltu.DM.10G024900.1			AT3G52910.1	GRF4	Growth-regulating factor 4
HD-ZIP	Soltu.DM.01G009150.2			AT1G69780.1	ATHB13	HD-ZIP family protein
HSF	Soltu.DM.02G017750.1		Heat Shock TF B2A	AT5G62020.1	HSFB2A	Heat shock transcription factor B2A
	Soltu.DM.02G017750.1			AT5G62020.1	HSFB2A	Heat shock transcription factor B2A
	Soltu.DM.04G033520.1			AT1G46264.1	HSB4	Heat shock transcription factor B4
LBD	Soltu.DM.05G003160.1			AT3G02550.1	LBD41	LOB domain-containing protein 41
	Soltu.DM.06G002830.1			AT2G30340.1	LBD13	LOB domain-containing protein 13
M-type_MADS	Soltu.DM.01G041090.1			AT5G48670.1	AGL80, FEM111	AGAMOUS-like 80
MYB	Soltu.DM.02G021850.1			AT3G12720.1	MYB67	Myb domain protein 67
	Soltu.DM.07G018770.1			AT3G23250.1	MYB15	Myb domain protein 15
	Soltu.DM.08G022510.1			AT5G16770.2	MYB9	Myb domain protein 9
	Soltu.DM.10G011320.1			AT1G09540.1	MYB61	Myb domain protein 61
	Soltu.DM.12G001810.1			AT1G48000.1	MYB112	Myb domain protein 112
	Soltu.DM.01G031190.1			AT3G60460.1	DUO1	Myb domain protein
	Soltu.DM.02G021850.1			AT3G12720.1	MYB67	Myb domain protein 67
	Soltu.DM.05G004700.1			AT1G22640.1	MYB3	Myb domain protein 3
	Soltu.DM.08G025560.1			AT4G22680.1	MYB85	Myb domain protein 85
NAC	Soltu.DM.05G027190.1		NAC104-like	AT5G64530.1	NAC1	Xylem NAC domain 1	TAIR
	Soltu.DM.02G004560.2			AT1G65910.1	NAC28	NAC domain containing protein 28
	Soltu.DM.05G027190.1			AT5G64530.1	NAC1	Xylem NAC domain 1
	Soltu.DM.06G001380.1			AT4G28530.1	NAC74	NAC domain containing protein 74
	Soltu.DM.07G024010.1			AT5G53950.1	NAC98	NAC family protein
	Soltu.DM.09G021350.1			AT4G28530.1	NAC74	NAC domain containing protein 74
	Soltu.DM.11G011390.1			AT1G71930.1	NAC74	Vascular related NAC-domain protein 7
SBP	Soltu.DM.10G008880.1	SBP8	Squamosa promoter binding -like 8	AT1G02065.1	SPL8	Squamosa promoter binding protein-like 8
	Soltu.DM.01G031370.1			AT1G02065.1	SPL8	Squamosa promoter binding protein-like 8
	Soltu.DM.10G008880.1			AT1G02065.1	SPL8	Squamosa promoter binding protein-like 8
TCP	Soltu.DM.06G025210.1			AT3G18550.1	BRC1, TCP18	Arrests axillary bud development
WOX	Soltu.DM.03G033140.1			AT3G18010.1	WOX1	WUSCHEL related homeobox 1
	Soltu.DM.06G028250.1			AT3G03660.1	WOX11	WUSCHEL related homeobox 11
WRKY	Soltu.DM.03G022860.1			AT4G11070.1	WRKY41	WRKY family protein
ZF-HD	Soltu.DM.03G019380.1	ZFHD-1		AT4G24660.1	HB22	Homeobox protein 22

## Sheet: Table S5
Table S5. Downregulated transcription factors at 2 and 3 dpi.
Family	Locus ID	S.tuberosum Gene Name	Arabidopsis Ortholog	Arabidopsis Gene Name	Arabidiopsis Gene Description	Reference
AP2/ERF	Soltu.DM.08G026940.1		AT5G52020.1	DREBA-4	DREB subfamily	TAIR
	Soltu.DM.09G026500.1		AT3G23230.1	ERF98, TDR1	Ethylene responsive factor
B3	Soltu.DM.06G029540.1		AT3G53310.1	REM16	Regulation of photoperiodism
bHLH	Soltu.DM.04G002320.1		AT1G09530.2	APAP3, PIF3, POC1	Phytochrome interacting factor 3
	Soltu.DM.05G006160.1		AT3G28857.1	PRE5	Paclobutrazol resistance 5
	Soltu.DM.07G011740.1		AT5G56960.1		bHLH family protein
	Soltu.DM.08G005120.1		AT4G17880.1	MCY4	JA-responses
bZIP	Soltu.DM.09G003280.1	StbZIP72	AT1G19490.1	bZIP62	bZIP family protein	Herath & Verchot 2020
C2H2	Soltu.DM.07G027990.1		AT5G56200.1		C2H2 family protein	TAIR
C3H	Soltu.DM.02G026270.1		AT1G66810.1		C3H family protein
	Soltu.DM.05G004270.1		AT1G68200.1		C3H family protein
Dof	Soltu.DM.02G018030.1		AT1G51700.1	DOF1	DOF zinc finger protein 1
HSF	Soltu.DM.02G015200.1		AT2G26150.1	HSFA2	Heat shock transcription factor A2
HSF	Soltu.DM.10G028040.1		AT2G41690.1	HSFB3	Heat shock transcription factor B3
MYB	Soltu.DM.01G027520.1		AT3G08500.1	MYB83	MYB domain protein 83
	Soltu.DM.03G014050.1		AT3G23250.1	MYB15	MYB domain protein 15
	Soltu.DM.04G004510.3		AT1G14350.1		MYB family protein
	Soltu.DM.05G005150.1		AT1G69560.1	MYB105	MYB domain protein 105
	Soltu.DM.07G018780.1		AT2G31180.1	MYB14	MYB domain protein 14
	Soltu.DM.07G018800.1		AT3G02940.1	MYB107	MYB domain protein 107
	Soltu.DM.08G028250.1		AT3G13890.2	MYB26	MYB domain protein 26
	Soltu.DM.03G014050.1		AT3G23250.1	MYB15	MYB domain protein 15
MYB_related	Soltu.DM.06G031580.1		AT1G07540.1	TRFL2	TRF-like 2
	Soltu.DM.07G017910.2		AT1G01380.1	ETC1	Trichome & root hair patterning
SBP	Soltu.DM.12G014160.1		AT1G69170.1	SPL6	Squamosa promoter binding
TCP	Soltu.DM.03G034300.2		AT3G18550.1	BRC1, TCP18	TCP family protein
WRKY	Soltu.DM.04G028130.1		AT5G64810.1	WRKY51	WRKY DNA-binding protein 51
	Soltu.DM.08G015910.2		AT1G80840.1	WRKY40	WRKY DNA-binding protein 40

## Sheet: Table S6
Table S6. Putative RGAs according to Spud and SolariX databases.
Family	Locus ID	Putative Function
NBS	*Soltu.DM.01G023270.1	Unknown function
TM-CC/ NBS	*Soltu.DM.05G006210.1	Induces by Meloidogyne javanica (root-knot nematode)
NBS	*Soltu.DM.09G010000.1	Unknown function
NBS	*Soltu.DM.12G004780.1	Downregulated by Phytophthora infestans
NBS	Soltu.DM.06G016200.1	ADR1-like, HOPZ-activated Pseudomonas resistance
NBS	Soltu.DM.12G029360.1	ABC-2 transporter
NBS	Soltu.DM.07G020640.1	ABC-2 transporter
RLP	Soltu.DM.04G000170.1	Phosphoribulokinase/uridine kinase
RLP	Soltu.DM.12G010960.1	Too many mouths (TMM)
RLP	Soltu.DM.10G019170.1	Verticillium wilt resistance, Ve1
RLP	Soltu.DM.03G032570.1	EF-Tu receptor (bacterial resistance)
RLK	Soltu.DM.10G014580.1	BAK1-interacting
RLK	Soltu.DM.03G016170.1	ERECTA
*Genes identified in the Solarix database

## Sheet: Table S7
Table S7. Primarily upregulated genes in PVX-infected S. tuberosum and tunicamycin treated Arabidopsis.
		PVX- 2dpi in Potato	PVX-3dpi in Potato	UPR-Arabidopsis
DPI	Locus ID	Upregulated/ Downregulated	Upregulated/ Downregulated	Upregulated/ Downregulated	Putative Arabidopsis Homolog	Arabidopsis Gene Model Description
2 dpi	Soltu.DM.01G009330.1	Upregulated	Upregulated	Upregulated	AT1G11920.1	Pectin lyase-like superfamily protein
	Soltu.DM.02G015220.1	Upregulated	Downregulated	Upregulated	AT1G16130.1	WAK-like receptor-like kinase with a cytoplasmic Ser/Thr protein kinase domain and an extracellular domain with EGF-like repeats.
	Soltu.DM.06G017540.1	Upregulated	NA	Upregulated	AT1G21900.1	ER-localized p24 protein. Interacts with p24beta2 at ER export sites for ER exit and coupled transport to the Golgi apparatus. Once in the Golgi, p24delta5 interacts very efficiently with the COPI machinery for retrograde transport back to the ER.
	Soltu.DM.08G005160.1	Upregulated	NA	Upregulated	AT1G56580.1	SMALLER WITH VARIABLE BRANCHES (SVB), a protein with a conserved domain of unknown function (DUF538). The trichomes of the SVB mutants are smaller and exhibit branches of variable length and number.
	Soltu.DM.02G028070.1	Upregulated	Upregulated	Upregulated	AT2G14960.1	Similar to IAA-amido synthases. Lines carrying an insertion in this gene are hypersensitive to auxin.
	Soltu.DM.11G010780.1	Upregulated	Upregulated	Upregulated	AT2G36690.1	Belonging to the Fe-dependent 2-oxoglutarate dioxygenase superfamily, catalyzes the stereospecific hydration of GA12 to produce DHGA12, negatively regulates ABA sensitivity during germination, phototrophic establishment and seedling development.
	Soltu.DM.11G026530.1	Upregulated	NA	Upregulated	AT2G37430.1	ZPT2, ZAT11-like zinc finger TF. Expressed in many root tips, primary roots, cotyledons and hypocotyl. Overexpression of ZAT11 causes increased root growth and increased sensitivity to nickel ions. The mRNA is cell-to-cell mobile.
	Soltu.DM.01G028300.1	Upregulated	Upregulated	Upregulated	AT2G44370.1	Cysteine/Histidine-rich C1 domain family protein
	Soltu.DM.02G031700.1	Upregulated	NA	Upregulated	AT3G01175.1	Transmembrane protein
	Soltu.DM.02G019340.1	Upregulated	NA	Upregulated	AT3G09280.1	Transmembrane protein
	Soltu.DM.12G029360.1	Upregulated	Upregulated	Upregulated	AT3G13220.1	ATP-binding cassette transporter G26 (ABCG26) involved in tapetal cell and pollen development. Required for male fertility and pollen exine formation.
	Soltu.DM.02G001870.1	Upregulated	NA	Upregulated	AT3G14300.1	Pectinesterase family protein
	Soltu.DM.03G012120.1	Upregulated	Upregulated	Upregulated	AT3G55700.1	UDP-Glycosyltransferase superfamily protein
	Soltu.DM.02G030860.1	Upregulated	Upregulated	Upregulated	AT3G62200.1	Putative endonuclease or glycosyl hydrolase
	*Soltu.DM.11G009590.1	Upregulated	Downregulated	Upregulated	AT4G11490.1	Cysteine-rich receptor-like protein kinase.
	Soltu.DM.08G027530.1	Upregulated	NA	Upregulated	AT4G15050.1	NEP-interacting protein, putative (DUF239)
	Soltu.DM.04G033030.1	Upregulated	Upregulated	Upregulated	AT4G31940.1	Cytochrome P450 enzyme, CYP82C. It is involved in the early Fe deficiency response.CYP82C4 hydroxylates fraxetin to generate sideretin (5-hydroxyfraxetin). Fraxetin and sideretin are catecholic coumarins secreted into the rhizosphere under conditions of low iron availability and help mobilize this nutrient from insoluble iron(III) pools in the soil.The mRNA is cell-to-cell mobile.
	*Soltu.DM.10G000360.1	Upregulated	Upregulated	Upregulated	AT5G16500.1	Receptor-like cytoplasmic kinase localized in the membrane of pollen tube tip regions that controls micropylar pollen tube guidance in Arabidopsis.
	*Soltu.DM.10G006870.1	Upregulated	Upregulated	Upregulated	AT5G51870.3	MADS-box transcription factor involved in floral transition.
	Soltu.DM.12G020960.1	Upregulated	Downregulated	Upregulated	AT5G52670.1	Member of plant specific copper transport protein family.
3 dpi	Soltu.DM.04G002580.1	NA	Upregulated	Upregulated	AT1G06330.1	Heavy metal transport/detoxification superfamily protein
	Soltu.DM.09G005200.1	Upregulated	Upregulated	Upregulated	AT1G11920.1	Pectin lyase-like superfamily protein
	Soltu.DM.06G018480.1	NA	Upregulated	Upregulated	AT1G32560.1	LEA4-1, a member of the Late Embryogenesis Abundant (LEA) proteins which typically accumulate in response to low water availability conditions imposed during development or by the environment.
	Soltu.DM.07G020640.1	NA	Upregulated	Upregulated	AT1G53270.1	ABC-2 type transporter family protein
	Soltu.DM.06G020580.1	NA	Upregulated	Upregulated	AT1G53940.1	Lipase, has in vitro lipase activity with p-nitrophenyl acetate and p-nitrophenyl butyrate, gene expression induced by hormones, negatively regulates auxin signaling, involved in disease resistance
	Soltu.DM.02G018070.1	NA	Upregulated	Upregulated	AT1G61080.1	Hydroxyproline-rich glycoprotein family protein
	Soltu.DM.05G013050.1	NA	Upregulated	Upregulated	AT1G65040.2	Arabidopsis homolog of the yeast/human Hrd1 protein: AT3G16090 (Hrd1A), AT1G65040 (Hrd1B). Involved in ERAD (Endoplasmic reticulum-associated degradation).
	Soltu.DM.03G019380.1	NA	Upregulated	Upregulated	AT1G69600.1	ZFHD1, a member of the zinc finger homeodomain transcriptional factor family. HD22, Binds to the 62 bp promoter region of ERD1 (early responsive to dehydration stress 1). Expression of ZFHD1 is induced by drought, high salinity and abscisic acid.
	Soltu.DM.02G023010.1	NA	Upregulated	Upregulated	AT1G76210.1	DUF241 domain protein, putative (DUF241)
	Soltu.DM.02G028070.1	Upregulated	Upregulated	Upregulated	AT2G14960.1	Similar to IAA-amido synthases. Lines carrying an insertion in this gene are hypersensitive to auxin.
	Soltu.DM.03G009690.1	NA	Upregulated	Upregulated	AT2G16120.1	Polyol/monosaccharide transporter 1
	Soltu.DM.10G025380.1	NA	Upregulated	Upregulated	AT2G35980.1	Protein whose sequence is similar to tobacco hairpin-induced gene (HIN1) and Arabidopsis non-race specific disease resistance gene (NDR1). Expression of this gene is induced by cucumber mosaic virus, spermine and during senescence. The gene product is localized to the chloroplast. The mRNA is cell-to-cell mobile.
	Soltu.DM.11G004860.1	Upregulated	Upregulated	Upregulated	AT2G36690.1	Protein belonging to the Fe-dependent 2-oxoglutarate dioxygenase superfamily, catalyzes the stereospecific hydration of GA12 to produce DHGA12, negatively regulates ABA sensitivity during germination, phototrophic establishment and seedling development.
	Soltu.DM.10G006790.2	NA	Upregulated	Upregulated	AT2G41870.1	Remorin family protein
	Soltu.DM.01G028390.1	Upregulated	Upregulated	Upregulated	AT2G44370.1	Cysteine/Histidine-rich C1 domain family protein
	Soltu.DM.10G005870.1	NA	Upregulated	Upregulated	AT2G46495.1	RING/U-box superfamily protein
	Soltu.DM.03G034600.1	NA	Upregulated	Upregulated	AT2G46960.2	Member of CYP709B
	Soltu.DM.10G010630.1	NA	Upregulated	Upregulated	AT3G09260.1	Beta-glucosidase.The major constituent of ER bodies. One of the most abundant proteins in Arabidopsis seedlings. Exist in an soluble (inactive) and non-soluble (active) form, most probably formed in a polymerization process. Involved in the mutualistic interaction between Arabidopsis and the endophytic fungus Piriformospora indica.
	Soltu.DM.12G029360.1	Upregulated	Upregulated	Upregulated	AT3G13220.1	ATP-binding cassette transporter G26 (ABCG26) involved in tapetal cell and pollen development. Required for male fertility and pollen exine formation.
	Soltu.DM.03G030920.1	NA	Upregulated	Upregulated	AT3G17690.1	Cyclic nucleotide gated channel family
	Soltu.DM.03G012110.1	Upregulated	Upregulated	Upregulated	AT3G55700.1	UDP-Glycosyltransferase superfamily protein
	Soltu.DM.02G030860.1	Upregulated	Upregulated	Upregulated	AT3G62200.1	Putative endonuclease or glycosyl hydrolase
	Soltu.DM.02G018650.1	NA	Upregulated	Upregulated	AT4G05010.1	F-box family protein
	Soltu.DM.04G024820.1	NA	Upregulated	Upregulated	AT4G09462.1	Carbohydrate-binding X8 domain superfamily protein
	Soltu.DM.06G022970.1	NA	Upregulated	Upregulated	AT4G29340.1	Profilin is a low-molecular weight, actin monomer-binding protein that regulates the organization of actin cytoskeleton in eukaryotes, including higher plants. PRF4 and PRF5 are late pollen-specific and are not detectable in other cell types of the plant body including microspores and root hairs. Immunocytochemical studies at the subcellular level reveal that both the constitutive and pollen-spec…
	Soltu.DM.04G027560.1	Upregulated	Upregulated	Upregulated	AT4G31940.1	The gene encodes a cytochrome P450 enzyme, CYP82C. It is involved in the early Fe deficiency response.CYP82C4 hydroxylates fraxetin to generate sideretin (5-hydroxyfraxetin). Fraxetin and sideretin are catecholic coumarins secreted into the rhizosphere under conditions of low iron availability and help mobilize this nutrient from insoluble iron(III) pools in the soil.The mRNA is cell-to-cell mobi…
	Soltu.DM.04G007240.1	NA	Upregulated	Upregulated	AT5G02580.1	Argininosuccinate lyase
	*Soltu.DM.07G020980.1	Upregulated	Upregulated	Upregulated	AT5G16500.1	Receptor-like cytoplasmic kinase localized in the membrane of pollen tube tip regions that controls micropylar pollen tube guidance in Arabidopsis.
	Soltu.DM.01G028600.1	NA	Upregulated	Upregulated	AT5G17760.1	P-loop containing nucleoside triphosphate hydrolases superfamily protein
	Soltu.DM.02G004560.2	NA	Upregulated	Upregulated	AT5G24590.2	NAC28-like protein. Interacts with turnip crinkle virus (TCV) capsid protein. Transcription factor involved in regulating the defense response of Arabidopsis to TCV.
	Soltu.DM.06G032960.1	NA	Upregulated	Upregulated	AT5G24940.1	Protein phosphatase 2C family protein
	Soltu.DM.01G041090.1	Upregulated	Upregulated	Upregulated	AT5G51870.3	AGL80-like, FEM111-likeMADS-box transcription factor involved in floral transition.
* These TF and RLK were not identified in the search results presented in Tables S4 and Figure 5.

## Sheet: Table S8
Table S8. Primarily downregulated genes identified in PVX infected S. tuberosum and in tunicamycin treated Arabidopsis.
		PVX- 2dpi in Potato	PVX-3dpi in Potato	UPR-Arabidopsis
DPI	Locus ID	Upregulated/ Downregulated	Upregulated/ Downregulated	Upregulated/ Downregulated	Putative Arabidopsis Homolog	Arabidopsis Gene Model Description
2 dpi	Soltu.DM.03G027130.1	Downregulated	NA	Downregulated	AT1G56710.1	Pectin lyase-like superfamily protein
	Soltu.DM.03G014050.1	Downregulated	Downregulated	Downregulated	AT1G66390.1	Production of anthocyanin pigment 2 protein (PAP2)
	Soltu.DM.01G025240.1	Downregulated	NA	Downregulated	AT3G27950.1	GDSL-motif esterase/acyltransferase/lipase. Enzyme group with broad substrate specificity that may catalyze acyltransfer or hydrolase reactions with lipid and non-lipid substrates.
	Soltu.DM.10G002800.1	Downregulated	NA	Downregulated	AT5G10130.1	Pollen Ole-1 allergen and extensin family protein
3dpi	Soltu.DM.01G022860.1	NA	Downregulated	Downregulated	AT1G05250.1	Cationic cell-wall-bound peroxidase homolog that is involved in the lignification of cell walls. Regulated by COG1, involved in seed longevity.
	Soltu.DM.12G019910.1	NA	Downregulated	Downregulated	AT1G05660.1	Pectin lyase-like superfamily protein
	Soltu.DM.12G003380.1	NA	Downregulated	Downregulated	AT1G23240.1	Caleosin-related family protein
	Soltu.DM.01G000110.1	NA	Downregulated	Downregulated	AT1G25240.1	ENTH/VHS/GAT family protein
	Soltu.DM.07G018570.1	NA	Downregulated	Downregulated	AT1G61390.1	S-locus lectin protein kinase family protein
	Soltu.DM.03G014050.1	Downregulated	Downregulated	Downregulated	AT1G66390.1	Production of anthocyanin pigment 2 protein (PAP2)
	Soltu.DM.05G002830.1	NA	Downregulated	Downregulated	AT1G68600.1	Aluminum activated malate transporter family protein
	Soltu.DM.04G000880.1	NA	Downregulated	Downregulated	AT2G39780.1	The main endoribonuclease activity in plant cells and localizes to the endoplasmic reticulum (ER), ER-derived structures, and vacuoles. It is essential for normal ribosomal RNA recycling. The mRNA is cell-to-cell mobile.
	Soltu.DM.07G026770.1	NA	Downregulated	Downregulated	AT3G51970.1	Acyl-CoA sterol acyl transferase 1
	Soltu.DM.09G003510.1	NA	Downregulated	Downregulated	AT3G52780.1	Purple acid phosphatases superfamily protein
	Soltu.DM.01G019830.1	NA	Downregulated	Downregulated	AT4G16260.1	Putative beta-1,3-endoglucanase that interacts with the 30C02 cyst nematode effector. May play a role in host defense.
	Soltu.DM.09G007070.1	NA	Downregulated	Downregulated	AT4G33720.1	CAP (Cysteine-rich secretory proteins, Antigen 5, and Pathogenesis-related 1 protein) superfamily protein
	Soltu.DM.08G016130.1	NA	Downregulated	Downregulated	AT5G01870.1	Predicted to encode a PR (pathogenesis-related) protein. Belongs to the lipid transfer protein (PR-14) family with the following members: At2g38540/LTP1, At2g38530/LTP2, At5g59320/LTP3, At5g59310/LTP4, At3g51600/LTP5, At3g08770/LTP6, At2g15050/LTP7, At2g18370/LTP8, At2g15325/LTP9, At5g01870/LTP10, At4g33355/LTP11, At3g51590/LTP12, At5g44265/LTP13, At5g62065/LTP14, At4g08530/LTP15.
	Soltu.DM.01G039840.1	NA	Downregulated	Downregulated	AT5G53110.1	RING/U-box superfamily protein
	Soltu.DM.09G026500.1	NA	Downregulated	Downregulated	AT5G64750.1	Putative transcription factor containing an AP2 domain. Is a member of the ERF (ethylene response factor) subfamily B-4 of ERF/AP2 transcription factor family. Expressed in response to ABA, osmotic stress, sugar stress and drought. Mutants are hypersensitive to these stresses. May be involved in regulation of ABA mediated stress response. The mRNA is cell-to-cell mobile.
